# Supplementary material
Source: Royal Society of Chemistry journal article supplement (doi:10.1039/d6cc03128e)
Supplement: d6cc03128e1.pdf [file d6cc03128e1.pdf]

Supporting information

**Organic base-promoted formal [4+1] cycloaddition of vinyl ethylene carbonates with elemental sulfur to facile access to thiophenones**

Yilong Yuan,<sup>‡</sup> Jialun Huang,<sup>‡</sup> Haichao Huang,<sup>‡</sup> Zhangli Hu, Xinlei Tao, Tianhua Liu, Si-Hai Wu, and Lianhui Wang\*

School of Medicine, Huaqiao University, Quanzhou, 362021, P. R. China

\* E-mail: lianhui.wang@hqu.edu.cn

<sup>‡</sup> These authors have contributed equally to this work.

Table of Contents

|                                                                                              |            |
|----------------------------------------------------------------------------------------------|------------|
| <b>1. General information.....</b>                                                           | <b>S2</b>  |
| <b>2. Optimization of reaction conditions.....</b>                                           | <b>S2</b>  |
| <b>3. General procedure for the [4 + 1] annulation of VECs 1 with S<sub>8</sub> (2).....</b> | <b>S6</b>  |
| <b>4. Characterization data of the thiophenone compounds 3.....</b>                          | <b>S6</b>  |
| <b>5. Gram-scale and late-stage functionalization experiments.....</b>                       | <b>S14</b> |
| <b>6. Mechanistic studies.....</b>                                                           | <b>S15</b> |
| <b>7. NMR spectra of compounds 3–5.....</b>                                                  | <b>S18</b> |
| <b>8. Single-crystal X-ray diffraction data.....</b>                                         | <b>S45</b> |
| <b>9. Unsuccessful substrates.....</b>                                                       | <b>S46</b> |
| <b>10. Reference.....</b>                                                                    | <b>S46</b> |

## 1. General information

All reactions were performed using flame-dried glassware under an atmosphere of dry Nitrogen, and all commercial materials and solvents were used directly without further purification, unless otherwise noted.

**Chromatography:** Flash column chromatography was performed using silica gel plates (Silica gel 200–300 mesh) from Qingdao Haiyang Chemical Co., Ltd.. Analytical thin layer chromatography (TLC) was performed on 0.25 mm silica gel 60-F254 from Yantai Jiangyou Silicone Development Co., Ltd., which was visualized with ultraviolet light.

**<sup>1</sup>H NMR, <sup>13</sup>C{<sup>1</sup>H} NMR, and <sup>19</sup>F NMR:** <sup>1</sup>H NMR spectra were recorded on a Bruker Avance III instrument (500 MHz). <sup>13</sup>C{<sup>1</sup>H} NMR spectra were recorded on a Bruker Avance III instrument (125 MHz) and were fully decoupled by broad band proton decoupling. <sup>19</sup>F NMR spectra were recorded on a Bruker Avance III instrument (471 MHz). NMR spectra were recorded in CDCl<sub>3</sub>. All NMR spectra were referenced to the solvent peaks (<sup>1</sup>H NMR: residual CDCl<sub>3</sub> = 7.26 ppm, DMSO-*d*<sub>6</sub> = 2.50 ppm, <sup>13</sup>C{<sup>1</sup>H} NMR: residual CDCl<sub>3</sub> = 77.16 ppm, DMSO-*d*<sub>6</sub> = 39.53 ppm) with tetramethylsilane (TMS, 0.00 ppm) as internal standard. Chemical shifts ( $\delta$ ) are reported in ppm, and coupling constants (*J*) are reported in hertz (Hz). Multiplicities are reported using the following abbreviations: s = singlet, d = doublet, t = triplet, q = quartet, m = multiplet.

**High-resolution mass spectra (HRMS)** were recorded on an Agilent 1290 mass spectrometer using ESI-TOF (electrospray ionization time-of-flight). The solution was directly infused via 20% mobile phase A (water) and 80% mobile phase B (Methanol) at 0.4 mL/min. All samples were analyzed in positive ion mode.

**X-ray** Crystallography data were collected and processed using Agilent Gemini E.

**Electron paramagnetic resonance (EPR)** spectra were performed on Bruker EMXplus-9.5/12.

**Melting points** were determined microscopic melting point detector using Gongyi City Yuhua Instrument Co., Ltd. (X-4, X-5).

Vinylethylene carbonates (VECs) **1** were prepared according to reported literature procedures.<sup>1-4</sup>

**Notice:** *The water content in commercial DMA could vary to a certain extent, which would lead to different amounts of H<sub>2</sub>O loadings, and thus affects reproducibility of experimental results. Therefore, to improve the accuracy, we consistently applied dried DMA as the solvent with the same equivalent of H<sub>2</sub>O as an additive in the following substrate screenings and mechanistic studies.*

## 2. Optimization of reaction conditions

We examined and optimized the reaction conditions for this [4 + 1] annulation of vinylethylene carbonate **1a** and S<sub>8</sub> (**2**), including additive, base, solvent, concentration of substrates, and reaction temperature and time as shown in **Table S1–7**.

**Table S1** Screening of additives<sup>a</sup>

|                                                                                     |   |                                                                                     |                                                                                                    |                                                                                       |
|-------------------------------------------------------------------------------------|---|-------------------------------------------------------------------------------------|----------------------------------------------------------------------------------------------------|---------------------------------------------------------------------------------------|
| 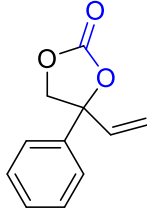 | + |  | $\xrightarrow[\text{DMF, 80 } ^\circ\text{C, N}_2, 16 \text{ h}]{\text{CsF (0.5 equiv) Additive}}$ |  |
| <b>1a</b>                                                                           |   | <b>2</b>                                                                            |                                                                                                    | <b>3a</b>                                                                             |
| Entry                                                                               |   | Additive (equiv.)                                                                   |                                                                                                    | <b>3a</b> (%) <sup>b</sup>                                                            |

|   |                            |    |
|---|----------------------------|----|
| 1 | –                          | 34 |
| 2 | Pd(PPh) <sub>3</sub> (0.1) | 0  |
| 3 | H <sub>2</sub> O (5.0)     | 42 |
| 4 | KPF <sub>6</sub> (2.0)     | 30 |

<sup>a</sup> Reaction conditions: **1a** (0.1 mmol), S<sub>8</sub> (**2**, 0.2 mmol), CsF (0.5 equiv.), additive (0.1–5.0 equiv.), DMF (1.0 mL) under N<sub>2</sub> at 80 °C for 16 h. <sup>b</sup> Isolated yields.

**Table S2** Screening of bases<sup>a</sup>

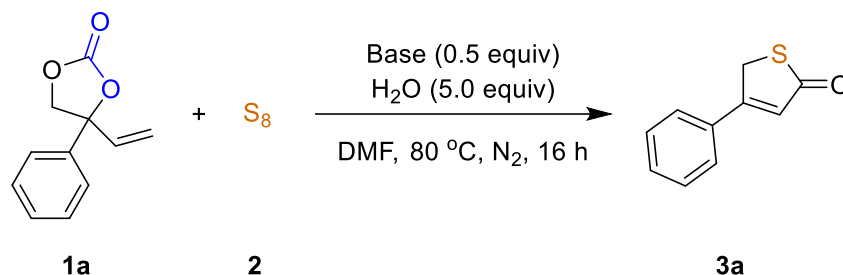

| Entry | Base                            | <b>3a</b> (%) <sup>b</sup> |
|-------|---------------------------------|----------------------------|
| 1     | CsF                             | 42                         |
| 2     | KF                              | 65                         |
| 3     | K <sub>3</sub> PO <sub>4</sub>  | 31                         |
| 4     | Na <sub>2</sub> CO <sub>3</sub> | 39                         |
| 5     | KHCO <sub>3</sub>               | 45                         |
| 6     | DBU                             | 0                          |
| 7     | IPA                             | 49                         |
| 8     | DIPEA                           | 71                         |
| 9     | DEA                             | 77                         |

<sup>a</sup> Reaction conditions: **1a** (0.1 mmol), S<sub>8</sub> (**2**, 0.2 mmol), base (0.5 equiv.), H<sub>2</sub>O (5.0 equiv.), DMF (1.0 mL) under N<sub>2</sub> at 80 °C for 16 h. <sup>b</sup> Isolated yields.

**Table S3** Screening of solvents<sup>a</sup>

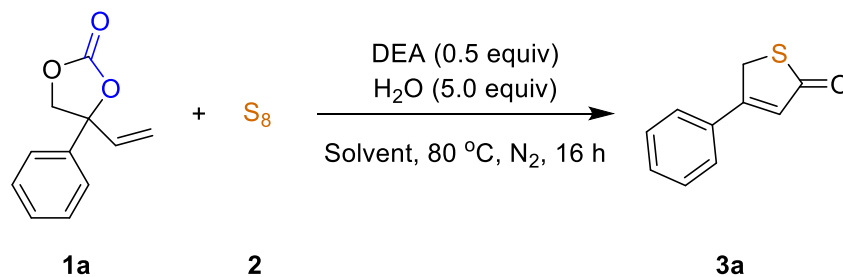

| Entry | Solvent          | <b>3a</b> (%) <sup>b</sup> |
|-------|------------------|----------------------------|
| 1     | DMF              | 77                         |
| 2     | H <sub>2</sub> O | 0                          |

|   |             |    |
|---|-------------|----|
| 3 | DMA         | 91 |
| 4 | NMP         | 0  |
| 5 | DMSO        | 0  |
| 6 | 1,4-dioxane | 0  |
| 7 | DCE         | 0  |
| 8 | MeOH        | 0  |
| 9 | EtOH        | 0  |

<sup>a</sup> Reaction conditions: **1a** (0.1 mmol), S<sub>8</sub> (**2**, 0.2 mmol), DEA (0.5 equiv.), H<sub>2</sub>O (5.0 equiv.), solvent (1.0 mL) under N<sub>2</sub> at 80 °C for 16 h. <sup>b</sup> Isolated yields. NMP = *N*-methylpyrrolidone. DCE = 1,2-dichloroethane.

**Table S4** Screening of reaction temperature<sup>a</sup>

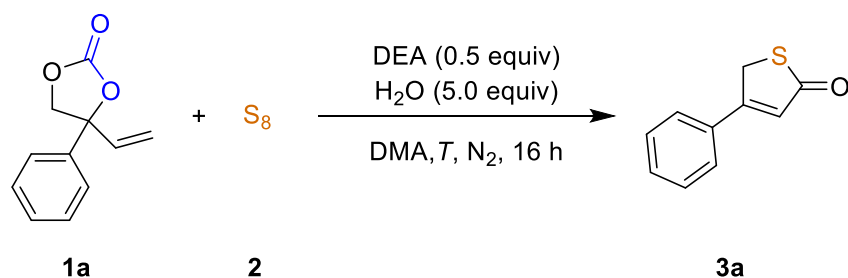

| Entry | <i>T</i> (°C) | <b>3a</b> (%) <sup>b</sup> |
|-------|---------------|----------------------------|
| 1     | 100           | 86                         |
| 2     | 80            | 91                         |
| 3     | 60            | 69                         |
| 4     | r.t. (23)     | 0                          |

<sup>a</sup> Reaction conditions: **1a** (0.1 mmol), S<sub>8</sub> (**2**, 0.2 mmol), DEA (0.5 equiv.), H<sub>2</sub>O (5.0 equiv.), solvent (1.0 mL) under N<sub>2</sub> for 16 h. <sup>b</sup> Isolated yields.

**Table S5** Screening of reaction time<sup>a</sup>

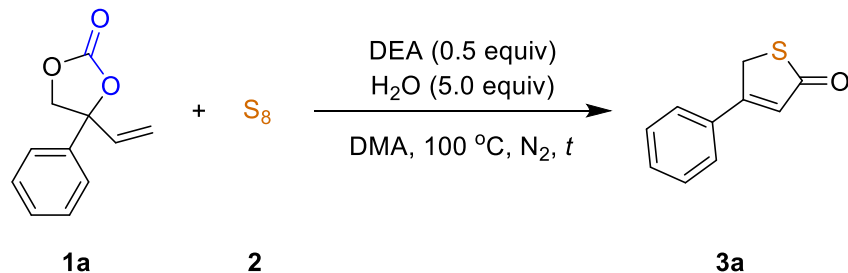

| Entry | <i>t</i> (h) | <b>3a</b> (%) <sup>b</sup> |
|-------|--------------|----------------------------|
| 1     | 12           | 76                         |
| 2     | 14           | 87                         |
| 3     | 16           | 91                         |
| 4     | 18           | 87                         |

<sup>a</sup> Reaction conditions: **1a** (0.1 mmol), S<sub>8</sub> (**2**, 0.2 mmol), DEA (0.5 equiv.), H<sub>2</sub>O (5.0 equiv.), DMA (1.0 mL) under N<sub>2</sub> at 80 °C. <sup>b</sup> Isolated yields.

**Table S6** Effect of substrate concentration<sup>a</sup>

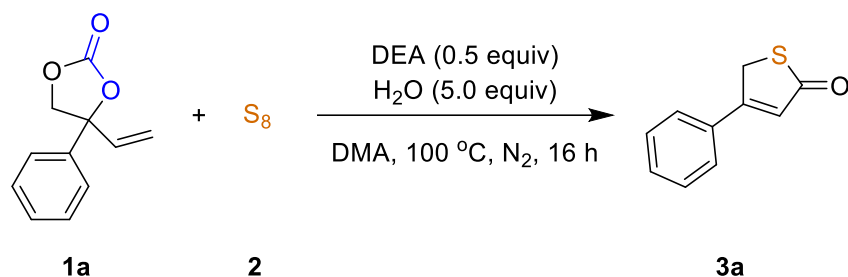

| Entry | <b>1a</b> (mmol) | <b>3a</b> (%) <sup>b</sup> |
|-------|------------------|----------------------------|
| 1     | 0.1              | 91                         |
| 2     | 0.2              | 85                         |
| 3     | 0.4              | 57                         |

<sup>a</sup> Reaction conditions: **1a** (0.1 mmol), S<sub>8</sub> (**2**, 0.2 equiv.), DEA (0.5 equiv.), H<sub>2</sub>O (5.0 equiv.), DMA (1.0 mL) under N<sub>2</sub> at 80 °C for 16 h. <sup>b</sup> Isolated yields.

**Table S7** Screening of S<sub>8</sub> Loadings<sup>a</sup>

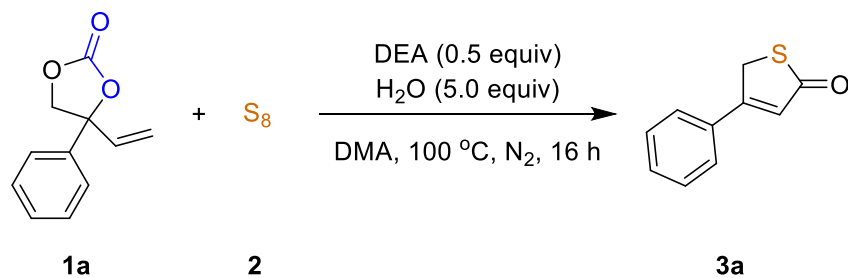

| Entry | S <sub>8</sub> (mmol) | <b>3a</b> (%) <sup>b</sup> |
|-------|-----------------------|----------------------------|
| 1     | 0.1                   | 76                         |
| 2     | 0.2                   | 91                         |
| 3     | 0.3                   | 92                         |

<sup>a</sup> Reaction conditions: **1a** (0.1 mmol), S<sub>8</sub> (**2**, 0.1–0.3 equiv.), DEA (0.5 equiv.), H<sub>2</sub>O (5.0 equiv.), DMA (1.0 mL) under N<sub>2</sub> at 80 °C for 16 h. <sup>b</sup> Isolated yields.

**Table S8** Control experiments<sup>a</sup>

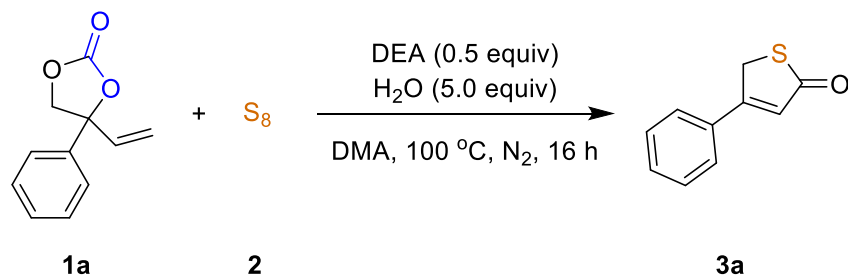

| Entry | Deviate from above | <b>3a</b> (%) <sup>b</sup> |
|-------|--------------------|----------------------------|
|-------|--------------------|----------------------------|

|   |                      |    |
|---|----------------------|----|
| 1 | None                 | 91 |
| 2 | w/o H <sub>2</sub> O | 46 |
| 3 | w/o DEA              | 0  |
| 4 | Under air            | 0  |

<sup>a</sup> Reaction conditions: **1a** (0.1 mmol), S<sub>8</sub> (**2**, 0.2 equiv.), DEA (0.5 equiv.), H<sub>2</sub>O (5.0 equiv.), DMA (1.0 mL) under N<sub>2</sub> at 80 °C. <sup>b</sup> Isolated yields.

### 3. General procedure for the [4 + 1] annulation of VECs **1** with S<sub>8</sub> (**2**)

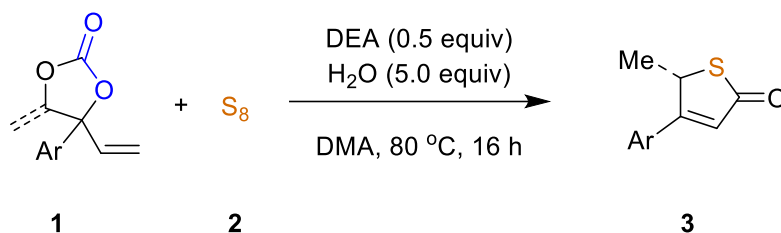

To a 15 mL Schlenk tube containing a stir bar were added vinyl ethylene carbonate **1** (0.2 mmol, 1.0 equiv.), elemental sulfur (S<sub>8</sub>, **2**; 102.6 mg, 0.4 mmol, 2.0 equiv.), DEA (15 μL, 0.1 mmol, 0.5 equiv.), H<sub>2</sub>O (18 μL, 10.0 mmol, 5.0 equiv.) and dry DMA (1.0 mL). Then the tube was evacuated and charged with N<sub>2</sub> three times. The mixture was stirred at 80 °C for 16 h. After cooling to ambient temperature, the mixture was quenched by the addition of H<sub>2</sub>O (10 mL). The aqueous phase was extracted with ethyl acetate (3 × 10 mL), and the combined organic phases were washed with brine, dried over Na<sub>2</sub>SO<sub>4</sub>, filtered, and concentrated in *vacuo*. The resulting residue was purified by column chromatography on silica gel with petroleum ether/ethyl acetate (v/v) afforded the corresponding 2(5H)-thiophenone products **3**.

### 4. Characterization data of the thiophenone compounds **3**

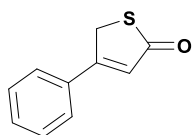

#### 4-phenylthiophen-2(5H)-one (**3a**)

Following the general procedure, the title compound **3a** was isolated as a purple-brown solid (16.0 mg, 91%) by column chromatography on silica gel eluting with petroleum ether/ethyl acetate (15:1→5:1, v/v).

M. p. 133–135 °C.

<sup>1</sup>H NMR (500 MHz, CDCl<sub>3</sub>) δ 7.64–7.56 (m, 2H), 7.52–7.43 (m, 3H), 6.70 (t, *J* = 1.6 Hz, 1H), 4.45 (d, *J* = 1.7 Hz, 2H).

<sup>13</sup>C{<sup>1</sup>H} NMR (125 MHz, CDCl<sub>3</sub>) δ 199.0, 165.3, 133.4, 131.2, 129.2, 126.9, 126.4, 37.6.

HRMS (ESI) *m/z* calcd for C<sub>10</sub>H<sub>9</sub>OS<sup>+</sup> [M + H]<sup>+</sup>: 177.0369, found 177.0377.

The spectral data were in accordance with those reported in the literature.<sup>5</sup>

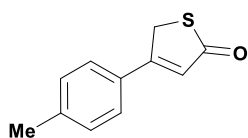

#### 4-(*p*-tolyl)thiophen-2(5*H*)-one (3b)

Following the general procedure, the title compound **3b** was isolated as a purple-brown solid (13.8 mg, 73%) by column chromatography on silica gel eluting with petroleum ether/ethyl acetate (15:1→5:1, v/v).

M. p. 132–134 °C.

<sup>1</sup>H NMR (500 MHz, CDCl<sub>3</sub>) δ 7.51 (d, *J* = 7.8 Hz, 2H), 7.29–7.18 (m, 2H), 6.65 (t, *J* = 1.6 Hz, 1H), 4.42 (d, *J* = 1.7 Hz, 2H), 2.41 (s, 3H).

<sup>13</sup>C{<sup>1</sup>H} NMR (125 MHz, CDCl<sub>3</sub>) δ 199.2, 165.3, 141.8, 130.6, 129.9, 126.3, 126.0, 37.5, 21.5.

HRMS (ESI) *m/z* calcd for C<sub>11</sub>H<sub>11</sub>OS<sup>+</sup> [M + H]<sup>+</sup>: 191.0525, found 191.0527.

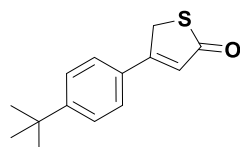

#### 4-{4-(*tert*-butyl)phenyl}thiophen-2(5*H*)-one (3c)

Following the general procedure, the title compound **3c** was isolated as a light-brown solid (14.1 mg, 61%) by column chromatography on silica gel eluting with petroleum ether/ethyl acetate (15:1→5:1, v/v).

M. p. 150–153 °C.

<sup>1</sup>H NMR (500 MHz, CDCl<sub>3</sub>) δ 7.56 (dt, *J* = 8.5, 2.0 Hz, 2H), 7.50 (dt, *J* = 8.5, 2.0 Hz, 2H), 6.69 (t, *J* = 1.6 Hz, 1H), 4.45 (d, *J* = 1.5 Hz, 2H), 1.37 (s, 9H).

<sup>13</sup>C{<sup>1</sup>H} NMR (125 MHz, CDCl<sub>3</sub>) δ 199.2, 165.3, 154.9, 130.6, 126.2, 126.2, 126.1, 37.5, 35.0, 31.1.

HRMS (ESI) *m/z* calcd for C<sub>14</sub>H<sub>17</sub>OS<sup>+</sup> [M + H]<sup>+</sup>: 233.0995, found 233.0989.

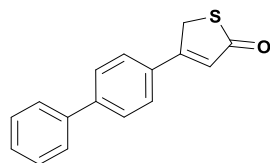

#### 4-([1,1'-biphenyl]-4-yl)thiophen-2(5*H*)-one (3d)

Following the general procedure, the title compound **3d** was isolated as a light-brown solid (16.5 mg, 65%) by column chromatography on silica gel eluting with petroleum ether/ethyl acetate (15:1→5:1, v/v).

M. p. 205–208 °C.

<sup>1</sup>H NMR (500 MHz, CDCl<sub>3</sub>) δ 7.73–7.68 (m, 4H), 7.67–7.63 (m, 2H), 7.50 (dd, *J* = 7.8, 7.2 Hz, 2H), 7.43 (ddt, *J* = 7.4, 7.2, 1.2 Hz, 1H), 6.76 (t, *J* = 1.6 Hz, 1H), 4.50 (d, *J* = 1.6 Hz, 2H).

<sup>13</sup>C{<sup>1</sup>H} NMR (125 MHz, CDCl<sub>3</sub>) δ 199.0, 164.7, 143.9, 139.7, 132.2, 129.0, 128.2, 127.8, 127.1, 126.9, 126.7, 37.5.

HRMS (ESI) *m/z* calcd for C<sub>16</sub>H<sub>13</sub>OS<sup>+</sup> [M + H]<sup>+</sup>: 253.0682, found 253.0670.

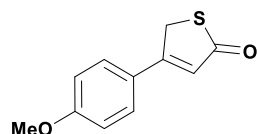

#### 4-(4-methoxyphenyl)thiophen-2(5*H*)-one (3e)

Following the general procedure, the title compound **3e** was isolated as a purple-brown solid (14.7 mg, 71%) by column chromatography on silica gel eluting with petroleum ether/ethyl acetate (15:1→5:1, v/v).

M. p. 134–135 °C.

$^1\text{H}$  NMR (500 MHz,  $\text{CDCl}_3$ )  $\delta$  7.57 (dt,  $J = 8.8, 3.0$  Hz, 2H), 6.98 (dt,  $J = 8.8, 3.0$  Hz, 2H), 6.61 (t,  $J = 1.5$  Hz, 1H), 4.43 (d,  $J = 1.5$  Hz, 2H), 3.89 (s, 3H).

$^{13}\text{C}\{^1\text{H}\}$  NMR (125 MHz,  $\text{CDCl}_3$ )  $\delta$  199.1, 164.9, 162.0, 128.1, 126.0, 124.7, 114.6, 55.5, 37.4.

HRMS (ESI)  $m/z$  calcd for  $\text{C}_{11}\text{H}_{10}\text{NaO}_2\text{S}^+$  [ $\text{M} + \text{Na}$ ] $^+$ : 229.0294, found 207.0299.

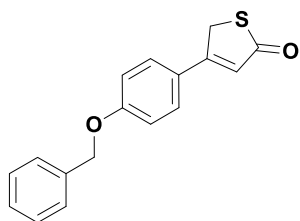

#### 4-{4-(benzyloxy)phenyl}thiophen-2(5H)-one (**3f**)

Following the general procedure, the title compound **3f** was isolated as a light-brown solid (18.6 mg, 66%) by column chromatography on silica gel eluting with petroleum ether/ethyl acetate (15:1→5:1, v/v).

M. p. 183–186 °C.

$^1\text{H}$  NMR (500 MHz,  $\text{CDCl}_3$ )  $\delta$  7.57 (dt,  $J = 8.8, 2.1$  Hz, 2H), 7.47–7.40 (m, 4H), 7.37 (ddt,  $J = 7.1, 6.7, 1.9$  Hz, 1H), 7.05 (dt,  $J = 8.8, 2.1$  Hz, 2H), 6.62 (t,  $J = 1.5$  Hz, 1H), 5.15 (s, 2H), 4.43 (d,  $J = 1.5$  Hz, 2H).

$^{13}\text{C}\{^1\text{H}\}$  NMR (126 MHz,  $\text{CDCl}_3$ )  $\delta$  199.1, 164.8, 161.1, 136.2, 128.7, 128.3, 128.1, 127.5, 126.2, 124.9, 115.4, 70.2, 37.4.

HRMS (ESI)  $m/z$  calcd for  $\text{C}_{17}\text{H}_{15}\text{O}_2\text{S}^+$  [ $\text{M} + \text{H}$ ] $^+$ : 283.0787, found 283.0792.

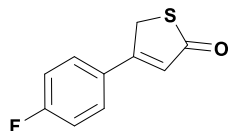

#### 4-(4-fluorophenyl)thiophen-2(5H)-one (**3g**)

Following the general procedure, the title compound **3g** was isolated as a black-brown solid (14.4 mg, 74%) by column chromatography on silica gel eluting with petroleum ether/ethyl acetate (15:1→5:1, v/v).

M. p. 133–134 °C.

$^1\text{H}$  NMR (500 MHz,  $\text{CDCl}_3$ )  $\delta$  7.63–7.58 (m, 2H), 7.16 (dd,  $J = 8.5, 8.5$  Hz, 2H), 6.65 (t,  $J = 1.6$  Hz, 1H), 4.42 (d,  $J = 1.6$  Hz, 2H).

$^{13}\text{C}\{^1\text{H}\}$  NMR (125 MHz,  $\text{CDCl}_3$ )  $\delta$  198.7, 164.4 (d,  $^1J_{\text{C-F}} = 251.7$  Hz), 163.9, 129.4 (d,  $^4J_{\text{C-F}} = 3.5$  Hz), 128.4 (d,  $^3J_{\text{C-F}} = 8.9$  Hz), 126.7, 116.4 (d,  $^2J_{\text{C-F}} = 22.9$  Hz), 37.5.

$^{19}\text{F}$  NMR (471 MHz,  $\text{CDCl}_3$ )  $\delta$  -108.01.

HRMS (ESI)  $m/z$  calcd for  $\text{C}_{10}\text{H}_7\text{FNaOS}^+$  [ $\text{M} + \text{Na}$ ] $^+$ : 217.0094, found 217.0101.

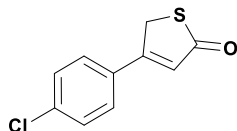

#### 4-(4-chlorophenyl)thiophen-2(5H)-one (3h)

Following the general procedure, the title compound **3h** was isolated as a yellow-brown solid (15.1 mg, 72%) by column chromatography on silica gel eluting with petroleum ether/ethyl acetate (15:1→5:1, v/v).

M. p. 134–136 °C.

$^1\text{H}$  NMR (500 MHz,  $\text{CDCl}_3$ )  $\delta$  7.55 (d,  $J$  = 8.6 Hz, 2H), 7.45 (d,  $J$  = 8.6 Hz, 2H), 6.68 (t,  $J$  = 1.6 Hz, 1H), 4.41 (d,  $J$  = 1.7 Hz, 2H).

$^{13}\text{C}\{^1\text{H}\}$  NMR (125 MHz,  $\text{CDCl}_3$ )  $\delta$  198.7, 163.7, 137.3, 131.8, 129.5, 127.6, 127.2, 37.46.

HRMS (ESI)  $m/z$  calcd for  $\text{C}_{10}\text{H}_7\text{ClNaOS}^+$  [ $\text{M} + \text{Na}$ ] $^+$ : 232.9798, found 232.9806.

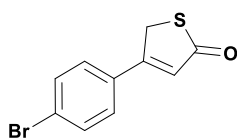

#### 4-(4-bromophenyl)thiophen-2(5H)-one (3i)

Following the general procedure, the title compound **3i** was isolated as a light-brown solid (17.8 mg, 70%) by column chromatography on silica gel eluting with petroleum ether/ethyl acetate (15:1→5:1, v/v).

M. p. 134–136 °C.

$^1\text{H}$  NMR (500 MHz,  $\text{CDCl}_3$ )  $\delta$  7.62 (d,  $J$  = 8.6 Hz, 2H), 7.48 (d,  $J$  = 8.6 Hz, 2H), 6.72 (t,  $J$  = 1.6 Hz, 1H), 4.43 (d,  $J$  = 1.6 Hz, 2H).

$^{13}\text{C}\{^1\text{H}\}$  NMR (125 MHz,  $\text{CDCl}_3$ )  $\delta$  198.6, 163.7, 132.5, 132.2, 127.8, 127.4, 125.7, 37.4.

HRMS (ESI)  $m/z$  calcd for  $\text{C}_{10}\text{H}_7\text{BrNaOS}^+$  [ $\text{M} + \text{Na}$ ] $^+$ : 276.9293, found 276.9300.

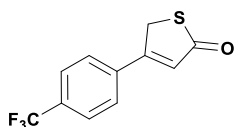

#### 4-(4-(trifluoromethyl)phenyl)thiophen-2(5H)-one (3j)

Following the general procedure, the title compound **3j** was isolated as a black-brown solid (18.8 mg, 77%) by column chromatography on silica gel eluting with petroleum ether/ethyl acetate (15:1→5:1, v/v).

M. p. 135–137 °C.

$^1\text{H}$  NMR (500 MHz,  $\text{CDCl}_3$ )  $\delta$  7.79–7.68 (m, 4H), 6.77 (s, 1H), 4.46 (d,  $J$  = 1.7 Hz, 2H).

$^{13}\text{C}\{^1\text{H}\}$  NMR (125 MHz,  $\text{CDCl}_3$ )  $\delta$  198.4, 163.2, 136.6, 132.8 (q,  $^2J_{\text{C-F}}$  = 34.1 Hz), 128.9, 126.7, 126.3 (q,  $^3J_{\text{C-F}}$  = 11.2 Hz), 126.3 (q,  $^1J_{\text{C-F}}$  = 272.4 Hz), 37.6.

$^{19}\text{F}$  NMR (471 MHz,  $\text{CDCl}_3$ )  $\delta$  -63.00.

HRMS (ESI)  $m/z$  calcd for  $\text{C}_{11}\text{H}_7\text{F}_3\text{NaOS}^+$  [ $\text{M} + \text{Na}$ ] $^+$ : 267.0062, found 267.0067.

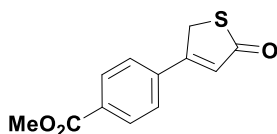

#### methyl 4-(5-oxo-2,5-dihydrothiophen-3-yl)benzoate (**3k**)

Following the general procedure, the title compound **3k** was isolated as a light-brown solid (16.2 mg, 69%) by column chromatography on silica gel eluting with petroleum ether/ethyl acetate (15:1→5:1, v/v).

M. p. 197–201 °C.

<sup>1</sup>H NMR (500 MHz, CDCl<sub>3</sub>) δ 8.13 (dt, *J* = 8.5, 2.0 Hz, 2H), 7.68 (dt, *J* = 8.5, 2.0 Hz, 2H), 6.79 (t, *J* = 1.6 Hz, 1H), 4.48 (d, *J* = 1.6 Hz, 2H), 3.97 (s, 3H).

<sup>13</sup>C{<sup>1</sup>H} NMR (125 MHz, CDCl<sub>3</sub>) δ 198.5, 166.1, 163.6, 137.3, 132.2, 130.4, 128.7, 126.3, 52.5, 37.6.

HRMS (ESI) *m/z* calcd for C<sub>12</sub>H<sub>11</sub>O<sub>3</sub>S<sup>+</sup> [M + H]<sup>+</sup>: 235.0423, found 235.0413.

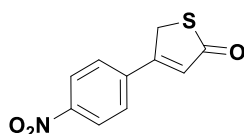

#### 4-(4-nitrophenyl)thiophen-2(5H)-one (**3l**)

Following the general procedure, the title compound **3l** was isolated as a light-brown solid (5.8 mg, 26%) by column chromatography on silica gel eluting with petroleum ether/ethyl acetate (10:1→2:1, v/v).

M. p. 169–172 °C.

<sup>1</sup>H NMR (500 MHz, CDCl<sub>3</sub>) δ 7.62 (dt, *J* = 8.6, 2.0 Hz, 2H), 6.71 (dt, *J* = 8.6, 2.0 Hz, 2H), 6.55 (t, *J* = 1.5 Hz, 1H), 4.40 (d, *J* = 1.5 Hz, 2H).

<sup>13</sup>C{<sup>1</sup>H} NMR (126 MHz, CDCl<sub>3</sub>) δ 199.3, 165.4, 149.4, 128.1, 123.4, 123.0, 114.8, 37.2.

HRMS (ESI) *m/z* calcd for C<sub>10</sub>H<sub>6</sub>NO<sub>3</sub>S<sup>-</sup> [M - H]<sup>-</sup>: 220.0074, found 220.0064.

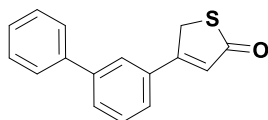

#### 4-([1,1'-biphenyl]-3-yl)thiophen-2(5H)-one (**3m**)

Following the general procedure, the title compound **3m** was isolated as a light-brown solid (13.5 mg, 54%) by column chromatography on silica gel eluting with petroleum ether/ethyl acetate (15:1→5:1, v/v).

M. p. 134–136 °C.

<sup>1</sup>H NMR (500 MHz, CDCl<sub>3</sub>) δ 7.79 (t, *J* = 1.8 Hz, 1H), 7.71 (dt, *J* = 7.5, 1.5 Hz, 1H), 7.64–7.58 (m, 3H), 7.56 (dd, *J* = 7.7, 7.5 Hz, 1H), 7.51 (dd, *J* = 7.8, 7.3 Hz, 2H), 7.43 (dt, *J* = 7.3, 2.0 Hz, 1H), 6.78 (t, *J* = 1.6 Hz, 1H), 4.51 (d, *J* = 1.6 Hz, 2H).

<sup>13</sup>C{<sup>1</sup>H} NMR (125 MHz, CDCl<sub>3</sub>) δ 198.9, 165.2, 142.4, 140.1, 133.9, 130.0, 129.7, 129.0, 128.0, 127.2, 127.2, 125.2, 125.2, 37.7.

HRMS (ESI) *m/z* calcd for C<sub>16</sub>H<sub>13</sub>OS<sup>+</sup> [M + H]<sup>+</sup>: 253.0682, found 253.0669.

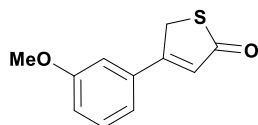

#### 4-(3-methoxyphenyl)thiophen-2(5H)-one (**3n**)

Following the general procedure, the title compound **3n** was isolated as a purple-brown solid (12.9 mg, 63%) by column chromatography on silica gel eluting with petroleum ether/ethyl acetate (15:1→5:1, v/v).

M. p. 134–136 °C.

$^1\text{H}$  NMR (500 MHz,  $\text{CDCl}_3$ )  $\delta$  7.40 (dd,  $J = 8.0$  Hz, 8.0 Hz 1H), 7.21–7.02 (m, 3H), 6.69 (q,  $J = 1.4$  Hz, 1H), 4.45–4.42 (m, 2H), 3.87 (d,  $J = 0.8$  Hz, 3H).

$^{13}\text{C}\{^1\text{H}\}$  NMR (125 MHz,  $\text{CDCl}_3$ )  $\delta$  199.0, 165.2, 160.0, 134.7, 130.3, 127.2, 118.8, 116.3, 112.2, 55.5, 37.6.

HRMS (ESI)  $m/z$  calcd for  $\text{C}_{11}\text{H}_{10}\text{NaO}_2\text{S}^+$  [ $\text{M} + \text{Na}$ ] $^+$ : 229.0294, found 229.0306.

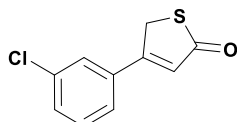

#### 4-(3-chlorophenyl)thiophen-2(5H)-one (**3o**)

Following the general procedure, the title compound **3o** was isolated as a yellow-brown solid (14.3 mg, 68%) by column chromatography on silica gel eluting with petroleum ether/ethyl acetate (15:1→5:1, v/v).

M. p. 133–135 °C.

$^1\text{H}$  NMR (500 MHz,  $\text{CDCl}_3$ )  $\delta$  7.58 (t,  $J = 1.9$  Hz, 1H), 7.52–7.41 (m, 3H), 6.72 (t,  $J = 1.7$  Hz, 1H), 4.43 (d,  $J = 1.7$  Hz, 2H).

$^{13}\text{C}\{^1\text{H}\}$  NMR (125 MHz,  $\text{CDCl}_3$ )  $\delta$  198.5, 163.4, 135.3, 133.9, 130.8, 129.3, 128.0, 125.0, 123.4, 37.5.

HRMS (ESI)  $m/z$  calcd for  $\text{C}_{10}\text{H}_7\text{ClNaOS}^+$  [ $\text{M} + \text{Na}$ ] $^+$ : 232.9798, found 232.9802.

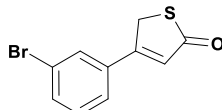

#### 4-(3-bromophenyl)thiophen-2(5H)-one (**3p**)

Following the general procedure, the title compound **3p** was isolated as a light-brown solid (17.4 mg, 65%) by column chromatography on silica gel eluting with petroleum ether/ethyl acetate (15:1→5:1, v/v).

M. p. 134–136 °C.

$^1\text{H}$  NMR (500 MHz,  $\text{CDCl}_3$ )  $\delta$  7.74 (t,  $J = 1.9$  Hz, 1H), 7.62 (ddd,  $J = 7.9, 2.0, 1.0$  Hz, 1H), 7.55 (ddd,  $J = 7.9, 1.8, 1.0$  Hz, 1H), 7.37 (t,  $J = 7.9$  Hz, 1H), 6.71 (t,  $J = 1.7$  Hz, 1H), 4.43 (d,  $J = 1.7$  Hz, 2H).

$^{13}\text{C}\{^1\text{H}\}$  NMR (125 MHz,  $\text{CDCl}_3$ )  $\delta$  198.5, 163.4, 135.3, 133.9, 130.8, 129.3, 128.0, 125.0, 123.4, 37.5.

HRMS (ESI)  $m/z$  calcd for  $\text{C}_{10}\text{H}_7\text{BrNaOS}^+$  [ $\text{M} + \text{Na}$ ] $^+$ : 276.9293, found 276.9302.

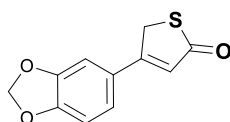

#### 4-(benzo[d][1,3]dioxol-5-yl)thiophen-2(5H)-one (**3q**)

Following the general procedure, the title compound **3q** was isolated as a light-brown solid (11.3 mg, 51%) by column chromatography on silica gel eluting with petroleum ether/ethyl acetate (15:1→5:1, v/v).

M. p. 204–207 °C.

<sup>1</sup>H NMR (500 MHz, DMSO-*d*<sub>6</sub>) δ 7.46 (d, *J* = 1.8 Hz, 1H), 7.36 (dd, *J* = 8.2, 1.8 Hz, 1H), 7.04 (d, *J* = 8.2 Hz, 1H), 6.90 (t, *J* = 1.5 Hz, 1H), 6.12 (s, 2H), 4.66 (d, *J* = 1.5 Hz, 2H).

<sup>13</sup>C{<sup>1</sup>H} NMR (125 MHz, DMSO-*d*<sub>6</sub>) δ 199.0, 166.8, 150.2, 148.5, 127.9, 124.9, 122.4, 109.0, 107.5, 102.3, 37.6.

HRMS (ESI) *m/z* calcd for C<sub>11</sub>H<sub>9</sub>O<sub>3</sub>S<sup>+</sup> [M + Na]<sup>+</sup>: 221.0267, found 221.0277.

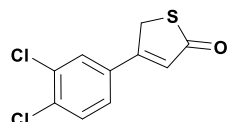

#### 4-(3,4-dichlorophenyl)thiophen-2(5H)-one (**3r**)

Following the general procedure, the title compound **3r** was isolated as a purple-brown solid (13.9 mg, 57%) by column chromatography on silica gel eluting with petroleum ether/ethyl acetate (15:1→5:1, v/v).

M. p. 134–136 °C.

<sup>1</sup>H NMR (500 MHz, CDCl<sub>3</sub>) δ 7.69 (d, *J* = 2.2 Hz, 1H), 7.57 (d, *J* = 8.5 Hz, 1H), 7.45 (dd, *J* = 8.4, 2.1 Hz, 1H), 6.71 (t, *J* = 1.6 Hz, 1H), 4.42 (d, *J* = 1.6 Hz, 2H).

<sup>13</sup>C{<sup>1</sup>H} NMR (125 MHz, CDCl<sub>3</sub>) δ 198.2, 162.3, 135.4, 133.8, 133.2, 131.3, 128.2, 128.1, 125.5, 37.4.

HRMS (ESI) *m/z* calcd for C<sub>10</sub>H<sub>7</sub>Cl<sub>2</sub>OS<sup>+</sup> [M + H]<sup>+</sup>: 244.9589, found 244.9582.

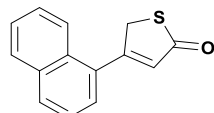

#### 4-(naphthalen-1-yl)thiophen-2(5H)-one (**3s**)

Following the general procedure, the title compound **3s** was isolated as a light-brown solid (15.3 mg, 68%) by column chromatography on silica gel eluting with petroleum ether/ethyl acetate (15:1→5:1, v/v).

M. p. 130–132 °C.

<sup>1</sup>H NMR (500 MHz, CDCl<sub>3</sub>) δ 8.01–7.93 (m, 3H), 7.61–7.57 (m, 2H), 7.56 (dd, *J* = 8.3, 7.0 Hz, 1H), 7.48 (dd, *J* = 7.2, 1.2 Hz, 1H), 6.61 (t, *J* = 1.7 Hz, 1H), 4.49 (d, *J* = 1.7 Hz, 2H).

<sup>13</sup>C{<sup>1</sup>H} NMR (125 MHz, CDCl<sub>3</sub>) δ 199.1, 166.1, 133.8, 133.0, 132.4, 130.2, 130.1, 128.8, 127.3, 126.6, 125.1, 125.0, 124.5, 41.1.

HRMS (ESI) *m/z* calcd for C<sub>14</sub>H<sub>11</sub>OS<sup>+</sup> [M + H]<sup>+</sup>: 227.0525, found 227.0518.

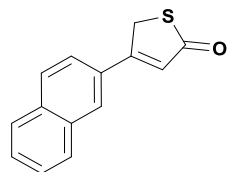

#### 4-(naphthalen-2-yl)thiophen-2(5H)-one (**3t**)

Following the general procedure, the title compound **3t** was isolated as a light-brown solid (18.1 mg, 80%) by column chromatography on silica gel eluting with petroleum ether/ethyl acetate (15:1→5:1, v/v).

M. p. 135–137 °C.

$^1\text{H}$  NMR (500 MHz,  $\text{CDCl}_3$ )  $\delta$  8.06 (d,  $J = 1.9$  Hz, 1H), 7.95–7.86 (m, 3H), 7.68 (dd,  $J = 8.7, 1.9$  Hz, 1H), 7.64–7.55 (m, 2H), 6.83 (q,  $J = 1.4$  Hz, 1H), 4.57 (t,  $J = 1.3$  Hz, 2H).

$^{13}\text{C}\{^1\text{H}\}$  NMR (125 MHz,  $\text{CDCl}_3$ )  $\delta$  199.0, 165.0, 134.4, 133.0, 130.7, 129.1, 128.9, 127.9, 127.2, 127.1, 126.3, 123.5, 37.6.

HRMS (ESI)  $m/z$  calcd for  $\text{C}_{14}\text{H}_{10}\text{NaOS}^+$  [ $\text{M} + \text{Na}$ ] $^+$ : 249.0345, found 249.0357.

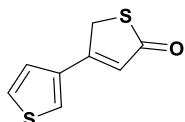

### (3,3'-bithiophen)-5(2H)-one (**3u**)

Following the general procedure, the title compound **3u** was isolated as a purple-brown solid (13.7 mg, 75%) by column chromatography on silica gel eluting with petroleum ether/ethyl acetate (15:1→5:1, v/v).

M. p. 136–138 °C.

$^1\text{H}$  NMR (500 MHz,  $\text{CDCl}_3$ )  $\delta$  7.66 (dd,  $J = 3.0, 1.3$  Hz, 1H), 7.45 (dd,  $J = 5.2, 2.8$  Hz, 1H), 7.33 (dd,  $J = 5.1, 1.3$  Hz, 1H), 6.56 (t,  $J = 1.5$  Hz, 1H), 4.43 (d,  $J = 1.5$  Hz, 2H).

$^{13}\text{C}\{^1\text{H}\}$  NMR (125 MHz,  $\text{CDCl}_3$ )  $\delta$  199.1, 159.7, 136.0, 127.5, 125.8, 125.7, 125.6, 37.6.

HRMS (ESI)  $m/z$  calcd for  $\text{C}_8\text{H}_6\text{NaOS}_2^+$  [ $\text{M} + \text{Na}$ ] $^+$ : 204.9752, found 204.9762.

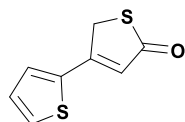

### (2,3'-bithiophen)-5'(2'H)-one (**3v**)

Following the general procedure, the title compound **3v** was isolated as a purple-brown solid (12.7 mg, 71%) by column chromatography on silica gel eluting with petroleum ether/ethyl acetate (15:1→5:1, v/v).

M. p. 134–136 °C.

$^1\text{H}$  NMR (500 MHz,  $\text{CDCl}_3$ )  $\delta$  7.54 (d,  $J = 5.1$  Hz, 1H), 7.43 (d,  $J = 3.8$  Hz, 1H), 7.15 (dd,  $J = 5.1, 3.7$  Hz, 1H), 6.54 (d,  $J = 1.5$  Hz, 1H), 4.45 (d,  $J = 1.5$  Hz, 2H).

$^{13}\text{C}\{^1\text{H}\}$  NMR (125 MHz,  $\text{CDCl}_3$ )  $\delta$  198.3, 158.4, 137.4, 129.8, 128.5, 127.9, 124.8, 37.4.

HRMS (ESI)  $m/z$  calcd for  $\text{C}_8\text{H}_6\text{NaOS}_2^+$  [ $\text{M} + \text{Na}$ ] $^+$ : 204.9752, found 204.9753.

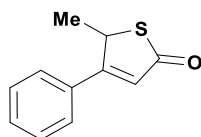

### 5-methyl-4-phenylthiophen-2(5H)-one (**3w**)

Following the general procedure, the title compound **3w** was isolated as a yellow-brown solid (11.6 mg, 61%) by column chromatography on silica gel eluting with petroleum ether/ethyl acetate (15:1→5:1, v/v).

M. p. 134–136 °C.

$^1\text{H}$  NMR (500 MHz,  $\text{CDCl}_3$ )  $\delta$  7.49 (d,  $J = 1.1$  Hz, 5H), 6.50 (s, 1H), 4.99–4.95 (m, 1H), 1.57 (d,  $J = 7.2$  Hz, 3H).

$^{13}\text{C}\{^1\text{H}\}$  NMR (125 MHz,  $\text{CDCl}_3$ )  $\delta$  197.7, 171.3, 132.7, 130.7, 129.2, 127.5, 127.3, 47.6, 21.0.

HRMS (ESI)  $m/z$  calcd for  $\text{C}_{11}\text{H}_{10}\text{NaOS}^+$  [ $\text{M} + \text{Na}$ ] $^+$ : 213.0345, found 213.0356.

## 5. Gram-scale and late-stage functionalization experiments

### 5.1 Gram scale synthesis of the thiophenone product **3a**

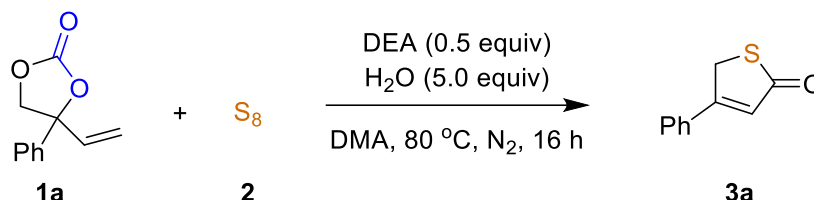

To a 50 mL round-bottom flask containing a stir bar were added vinyl ethylene carbonate **1a** (0.95 g, 5.0 mmol, 1.0 equiv.), elemental sulfur ( $\text{S}_8$ , **2**; 2.56 g, 10.0 mmol, 2.0 equiv.), DEA (375  $\mu\text{L}$ , 12.5 mmol, 0.5 equiv.), H<sub>2</sub>O (2.2 mL, 125 mmol, 5.0 equiv.), and dry DMA (25.0 mL). Then the tube was evacuated and charged with N<sub>2</sub> three times. The mixture was stirred at 80 °C for 16 h. After cooling to ambient temperature, the solvent was removed under reduced pressure, and the residue was quenched by the addition of H<sub>2</sub>O (50 mL). The aqueous phase was extracted with ethyl acetate (3 $\times$ 50 mL), and the combined organic phases were washed with brine, dried over Na<sub>2</sub>SO<sub>4</sub>, filtered, and concentrated in *vacuo*. The resulting residue was purified by column chromatography on silica gel with petroleum ether/ethyl acetate (15:1 $\rightarrow$ 5:1, v/v) afforded the corresponding 2(5H)-thiophenone product **3a** in 76% yield (0.67 g) as a purple-brown solid.

**Notice:** Due to the high boiling point of DMA (165 °C), the large amount of solvent could not be completely removed by rotary evaporation, resulting in impure target product **3a** during subsequent column chromatography, and therefore a solvent-reduced approach (halved solvent volume, 25 mL) was adopted for the gram-scale reaction.

### 5.2 Synthesis of 2-thiophenyl trifluoromethanesulfonate (**4**)

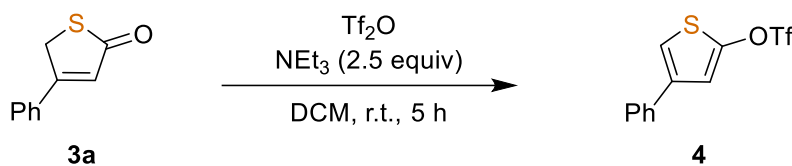

To a 15 mL Schlenk tube containing a stir bar were added 2(5H)-thiophenone **3a** (17.6.0 mg, 0.1 mmol, 1.0 equiv.), Tf<sub>2</sub>O (28.2 mg, 0.1 mmol, 1.0 equiv.), Et<sub>3</sub>N (35  $\mu\text{L}$ , 0.25 mmol, 2.5 equiv.), and DCM (1.0 mL). Then the tube was evacuated and charged with N<sub>2</sub> three times. The mixture was stirred at ambient temperature for 5 h and then was quenched by the addition of H<sub>2</sub>O (15 mL). The aqueous phase was extracted with ethyl acetate (3 $\times$ 15 mL), and the combined organic phases were washed with brine, dried over Na<sub>2</sub>SO<sub>4</sub>, filtered, and concentrated in *vacuo*. The resulting residue was purified by column chromatography on silica gel with petroleum ether/ethyl acetate (65:1 $\rightarrow$ 35:1, v/v) afforded 2-thiophenyl trifluoromethanesulfonate (**4**) in 37% yield (11.3 mg) as a colorless-brown oil.

### 4-phenylthiophen-2-yl trifluoromethanesulfonate (**4**)

$^1\text{H}$  NMR (500 MHz,  $\text{CDCl}_3$ )  $\delta$  7.55 (d,  $J = 7.5$  Hz, 2H), 7.44 (dd,  $J = 7.5, 7.4$  Hz, 2H), 7.37 (dd,  $J$

= 7.5, 7.4 Hz, 1H), 7.22 (d,  $J$  = 1.9 Hz, 1H), 7.17 (d,  $J$  = 1.9 Hz, 1H).

$^{13}\text{C}\{^1\text{H}\}$  NMR (125 MHz,  $\text{CDCl}_3$ )  $\delta$  149.5, 139.5, 134.7, 129.0, 128.0, 126.1, 117.9, 117.5, 115.0.

$^{19}\text{F}$  NMR (471 MHz,  $\text{CDCl}_3$ )  $\delta$  -71.46.

HRMS (ESI)  $m/z$  calcd for  $\text{C}_{11}\text{H}_7\text{F}_3\text{NaO}_3\text{S}_2^+$  [ $\text{M} + \text{Na}$ ] $^+$ : 330.9681, found 330.9686.

### 5.3 Synthesis of 2-thiophenyl 4-methylbenzenesulfonate (5)

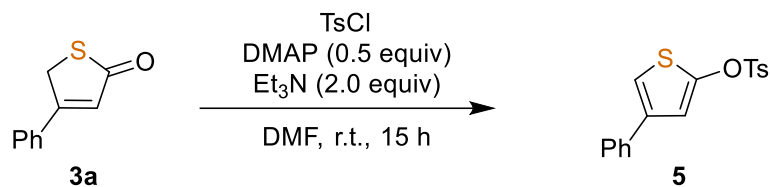

To a 15 mL Schlenk tube containing a stir bar were added 2(5*H*)-thiophenone **3a** (22.9 mg, 0.13 mmol, 1.3 equiv.), TsCl (28.2 mg, 0.1 mmol, 1.0 equiv.), 4-dimethylaminopyridine (DMAP, 6.1 mg, 0.05 mmol, 0.5 equiv.), Et<sub>3</sub>N (28  $\mu\text{L}$ , 0.2 mmol, 2.0 equiv.), and DMF (1.0 mL). Then the tube was evacuated and charged with N<sub>2</sub> three times. The mixture was stirred at ambient temperature for 15 h and then was quenched by the addition of H<sub>2</sub>O (15 mL). The aqueous phase was extracted with ethyl acetate (3 $\times$ 15 mL), and the combined organic phases were washed with brine, dried over Na<sub>2</sub>SO<sub>4</sub>, filtered, and concentrated in *vacuo*. The resulting residue was purified by column chromatography on silica gel with petroleum ether/ethyl acetate (15:1 $\rightarrow$ 5:1, v/v) afforded 2-thiophenyl 4-methylbenzenesulfonate (**5**) in 45% yield (14.8 mg) as a yellow-brown oil.

### 4-phenylthiophen-2-yl 4-methylbenzenesulfonate (5)

$^1\text{H}$  NMR (500 MHz,  $\text{CDCl}_3$ )  $\delta$  7.81 (d,  $J$  = 8.2 Hz, 2H), 7.47 (d,  $J$  = 7.6 Hz, 2H), 7.41–7.35 (m, 4H), 7.31 (dd,  $J$  = 7.6, 7.0 Hz, 1H), 7.01 (d,  $J$  = 1.9 Hz, 1H), 6.91 (d,  $J$  = 1.9 Hz, 1H), 2.49 (s, 3H).

$^{13}\text{C}\{^1\text{H}\}$  NMR (125 MHz,  $\text{CDCl}_3$ )  $\delta$  151.1, 146.2, 139.0, 135.2, 130.9, 129.9, 129.0, 128.9, 127.6, 126.0, 117.3, 114.27, 21.8.

HRMS (ESI)  $m/z$  calcd for  $\text{C}_{17}\text{H}_{15}\text{O}_3\text{S}_2^+$  [ $\text{M} + \text{H}$ ] $^+$ : 331.0457, found 331.0452.

## 6. Mechanistic studies

### 6.1 Radical inhibition experiment

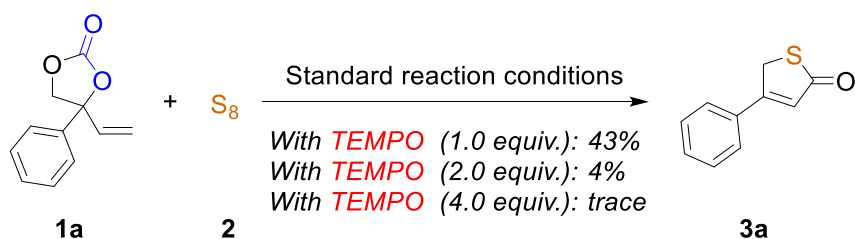

To a 15 mL Schlenk tube containing a stir bar were added vinyl ethylene carbonate **1a** (0.2 mmol, 1.0 equiv.), elemental sulfur ( $\text{S}_8$ , **2**; 102.6 mg, 0.4 mmol, 2.0 equiv.), DEA (15  $\mu\text{L}$ , 0.1 mmol, 0.5 equiv.), H<sub>2</sub>O (18  $\mu\text{L}$ , 10.0 mmol, 5.0 equiv.), TEMPO (31.2/62.5/125.0 mg, 0.2/0.4/0.8 mmol, 1.0/2.0/4.0 equiv.), and dry DMA (1.0 mL). Then the tube was evacuated and charged with N<sub>2</sub> three times. The mixture was stirred at 80°C for 16 h. After cooling to ambient temperature, the target product **3a** was purified by column chromatography on silica gel with petroleum ether/ethyl acetate (15:1 $\rightarrow$ 5:1, v/v).

### 6.2 EPR experiments

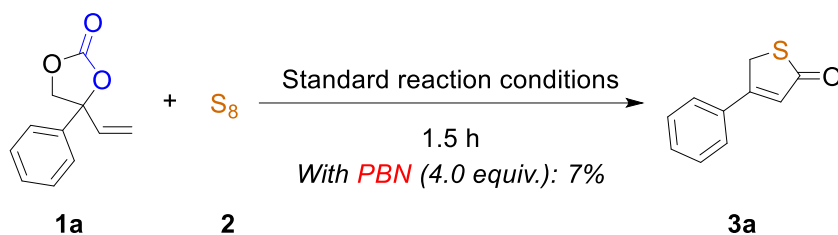

To a 15 mL Schlenk tube containing a stir bar were added vinyl ethylene carbonate **1a** (19.0 mg, 0.1 mmol, 1.0 equiv.), elemental sulfur ( $\text{S}_8$ , **2**; 51.3 mg, 0.2 mmol, 2.0 equiv.), DEA (7  $\mu\text{L}$ , 0.05 mmol, 0.5 equiv.),  $\text{H}_2\text{O}$  (9  $\mu\text{L}$ , 5.0 mmol, 5.0 equiv.), PBN (72  $\mu\text{L}$ , 0.4 mmol, 4.0 equiv.), and dry DMA (1.0 mL). Then the tube was evacuated and charged with  $\text{N}_2$  three times. The mixture was stirred at 80 °C for 1.5 h. The resulting reaction mixture was measured by EPR, and no diagnostic signal was observed by EPR measurements (Fig. S1; the EPR spectrum was recorded at 77 K on Bruker EMXplus-9.5/12). Meanwhile, the target product **3a** was isolated in 7% yield by column chromatography on silica gel with petroleum ether/ethyl acetate (15:1→5:1, v/v).

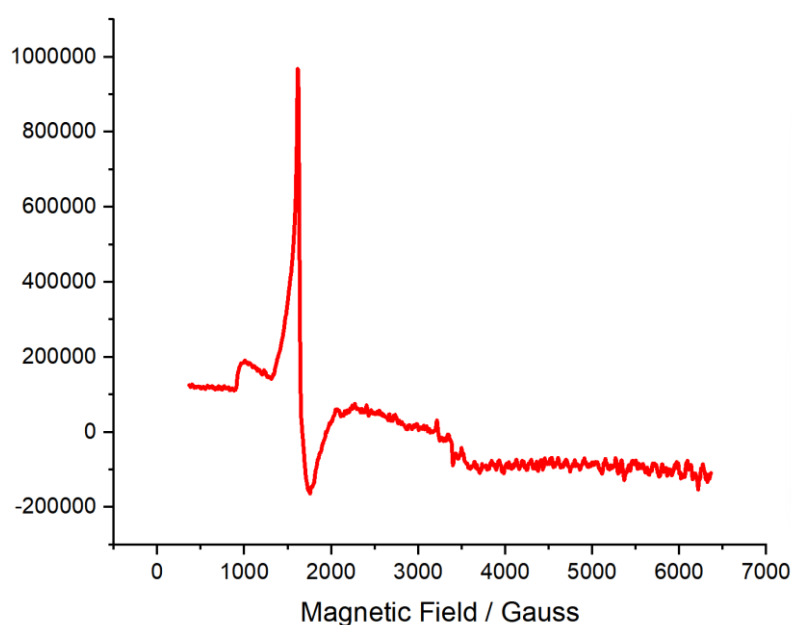

**Fig. S1** EPR experiment under the standard reaction conditions.

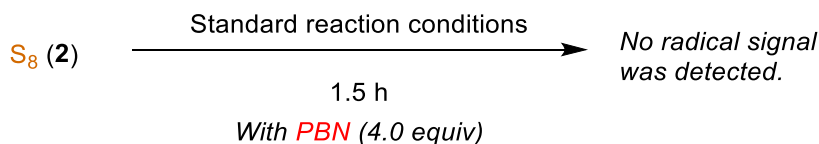

To a 15 mL Schlenk tube containing a stir bar were added elemental sulfur ( $\text{S}_8$ , **2**; 51.3 mg, 0.2 mmol, 2.0 equiv.), DEA (7  $\mu\text{L}$ , 0.05 mmol, 0.5 equiv.),  $\text{H}_2\text{O}$  (9  $\mu\text{L}$ , 5.0 mmol, 5.0 equiv.), PBN (72  $\mu\text{L}$ , 0.4 mmol, 4.0 equiv.), and dry DMA (1.0 mL). Then the tube was evacuated and charged with  $\text{N}_2$  three times. The mixture was stirred at 80 °C for 1.5 h, and no diagnostic signal was observed by EPR analysis ((Fig. S2; the EPR spectrum was recorded at 77 K on Bruker EMXplus-9.5/12).

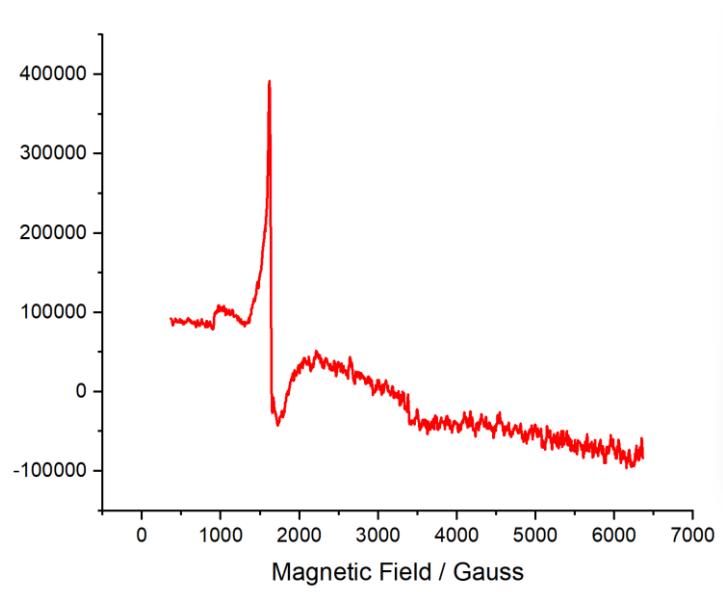

**Fig. S2** EPR experiment by mixing S<sub>8</sub> and DIPEA upon heating.

## 7. NMR spectra of compounds 3–5

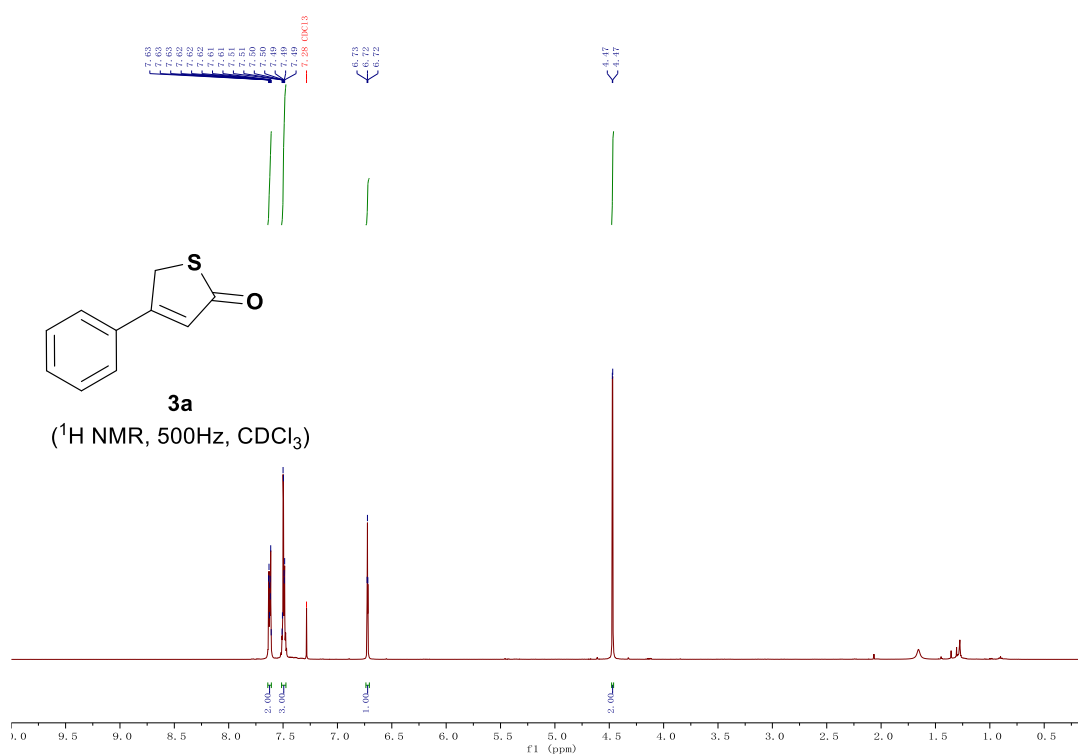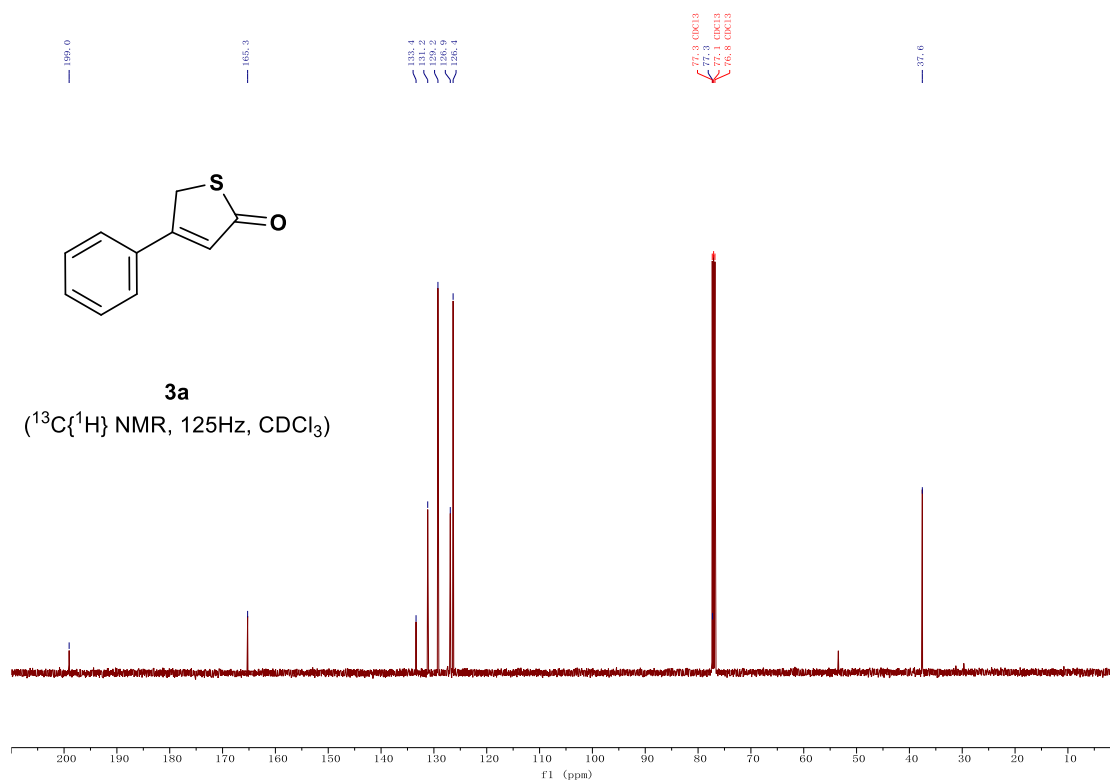



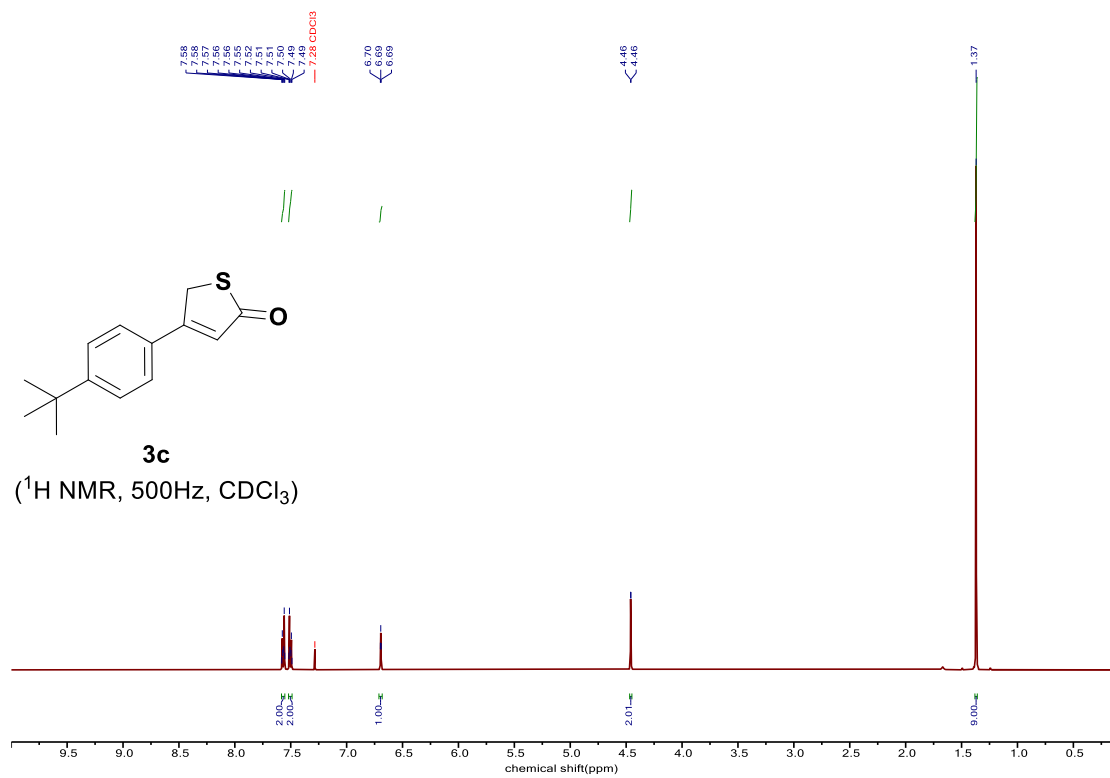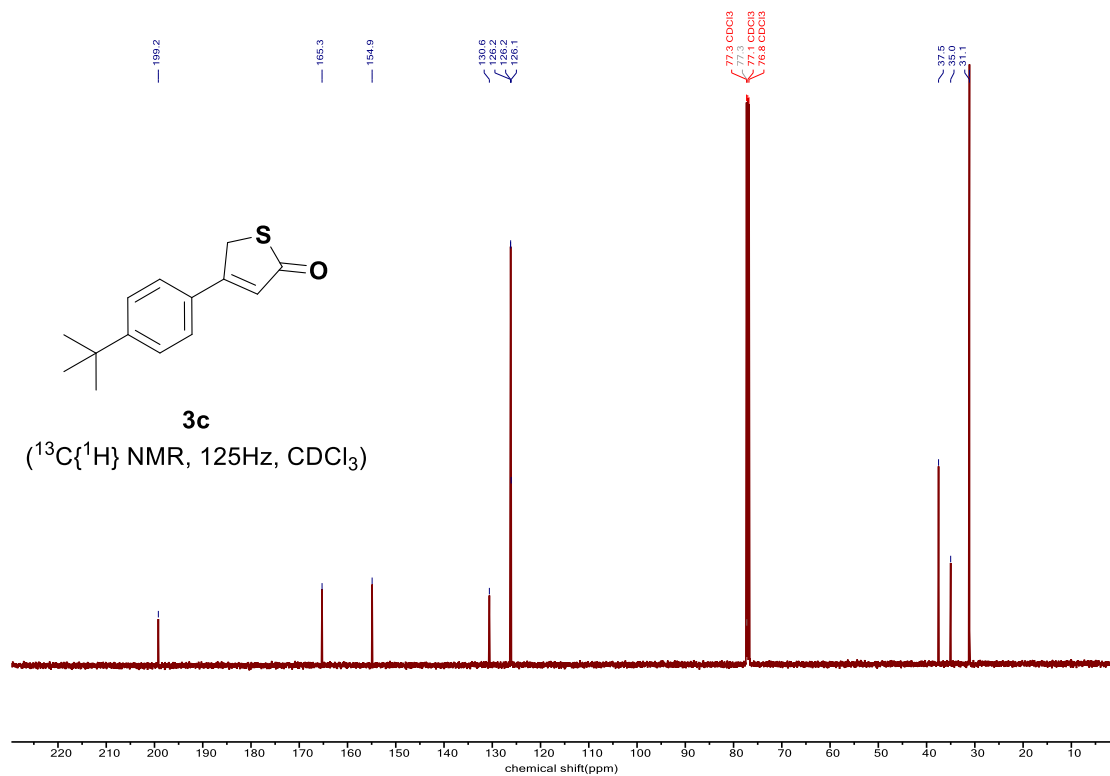

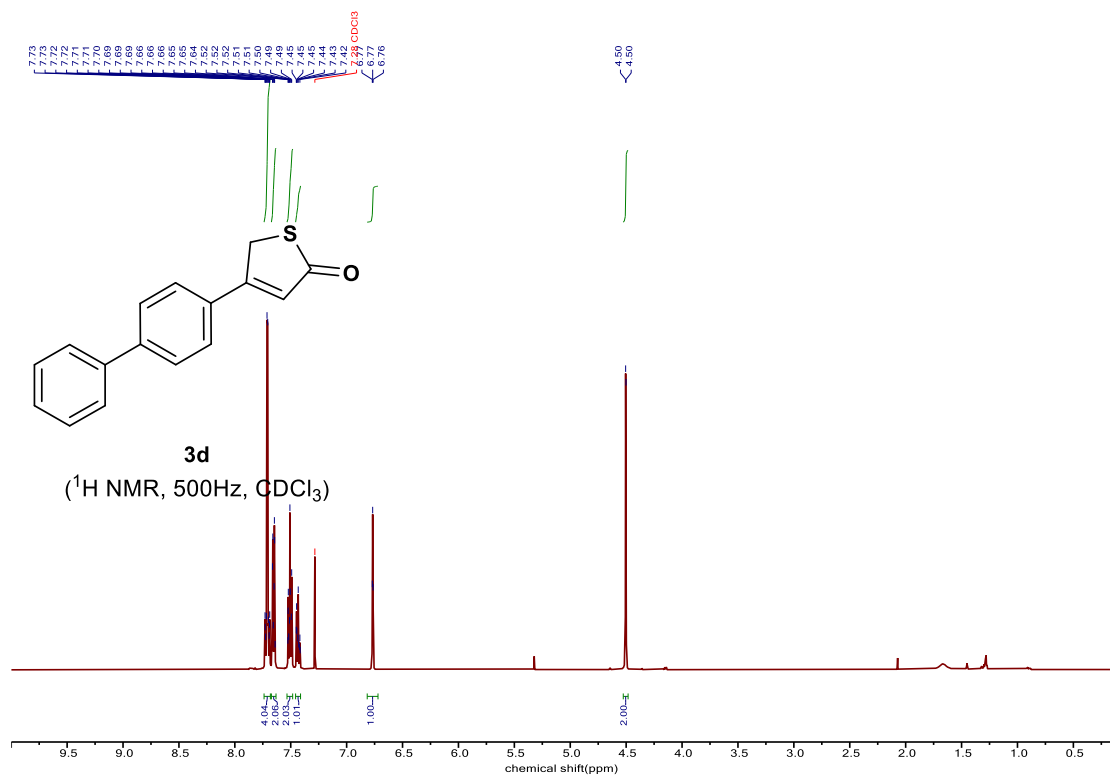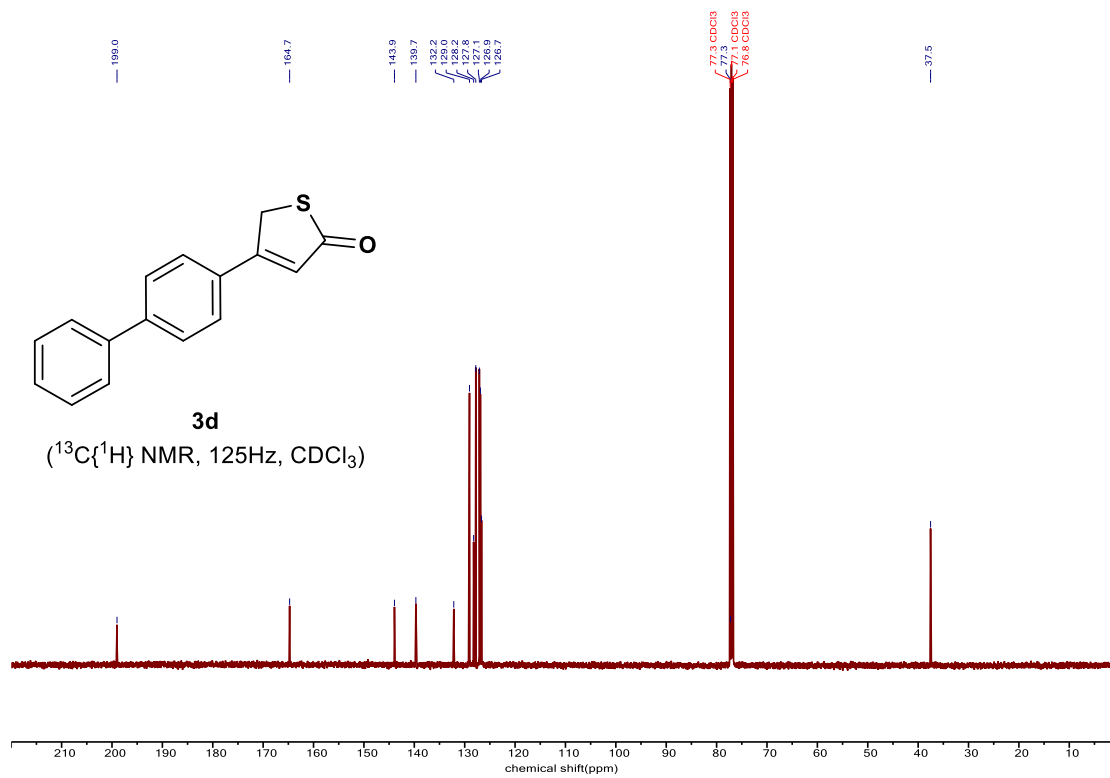

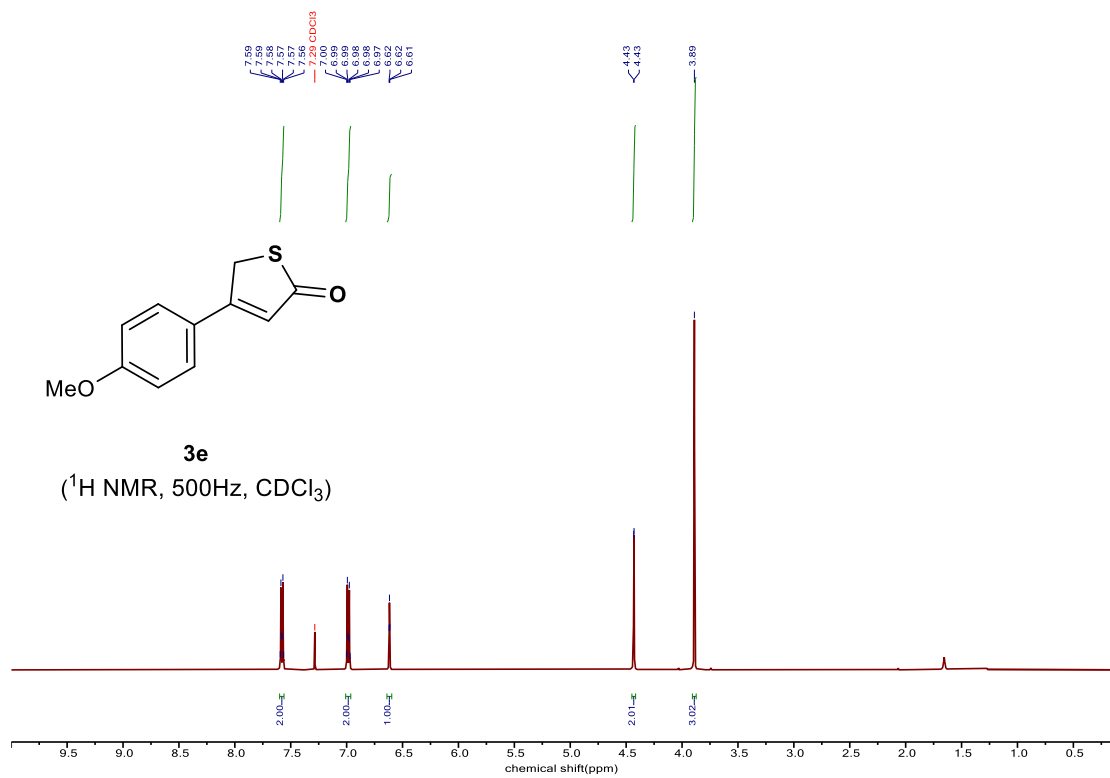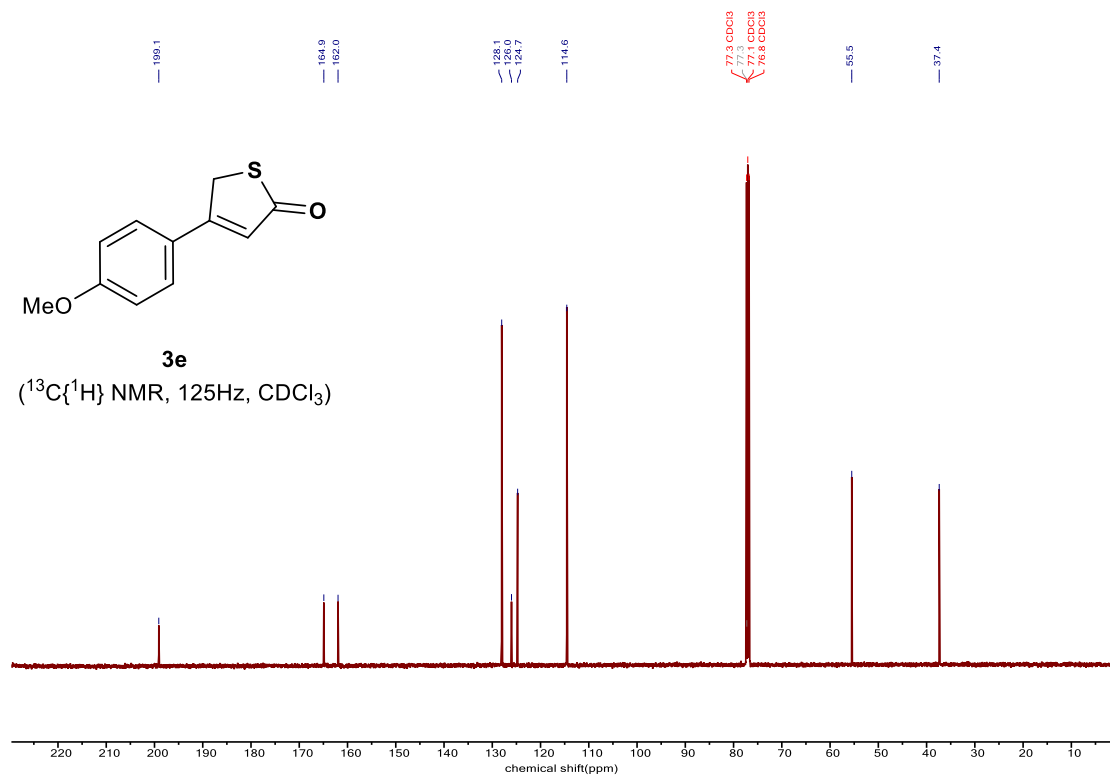

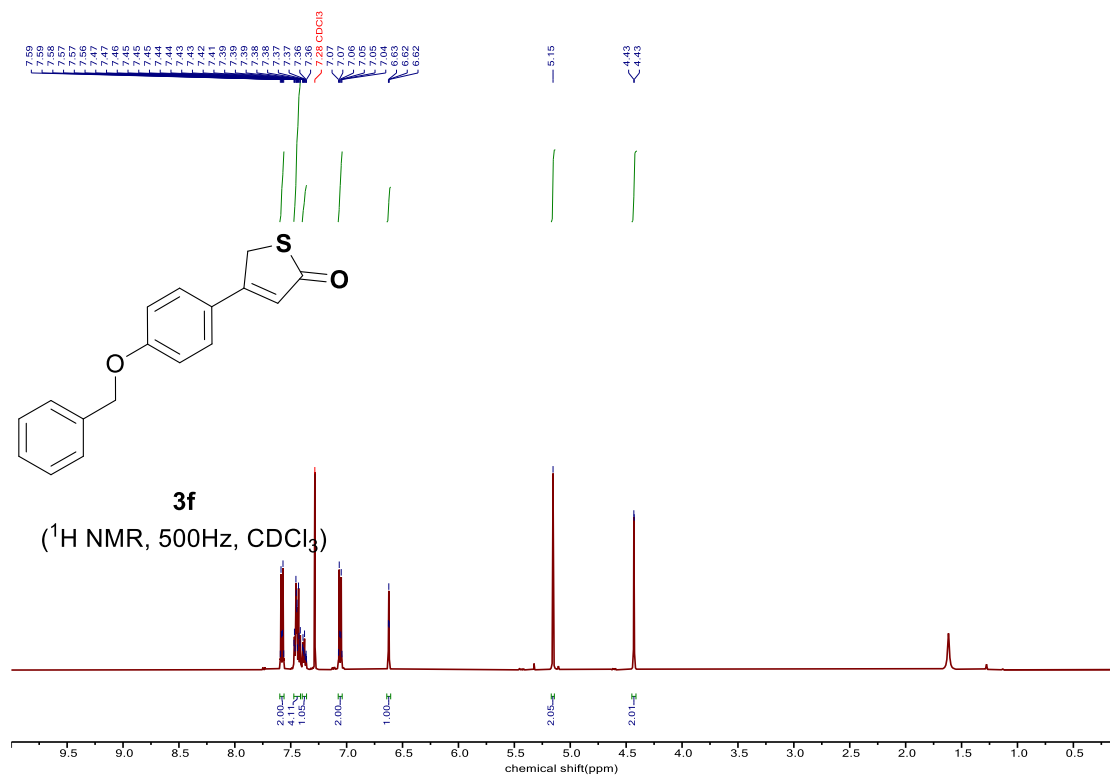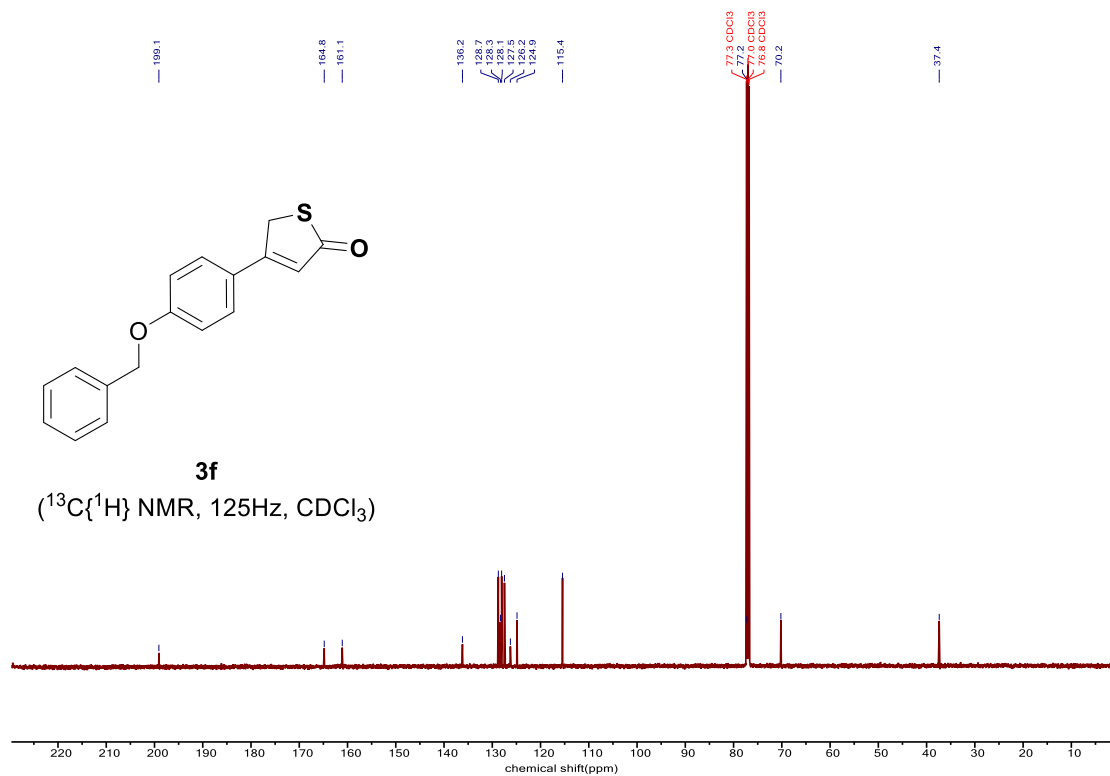



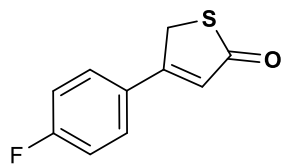

**3g**  
(<sup>19</sup>F NMR, 471Hz, CDCl<sub>3</sub>)

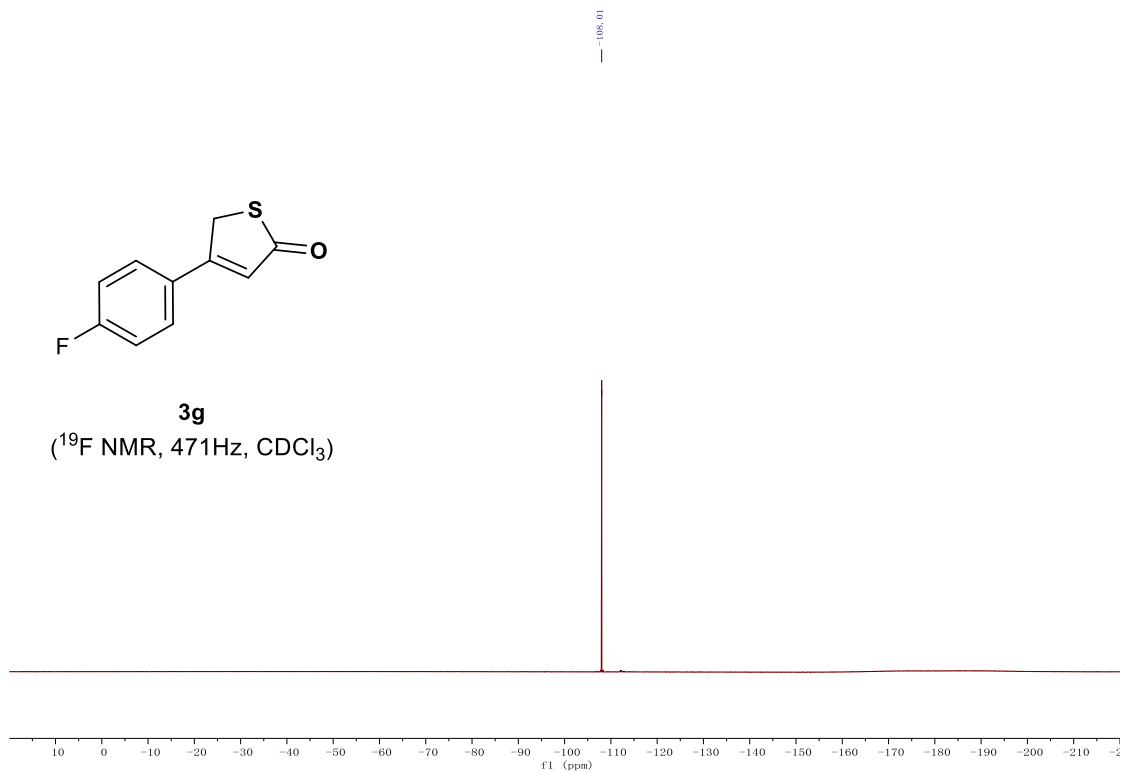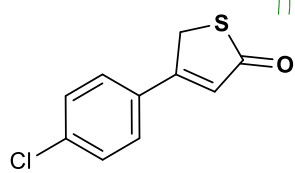

**3h**  
(<sup>1</sup>H NMR, 500Hz, CDCl<sub>3</sub>)

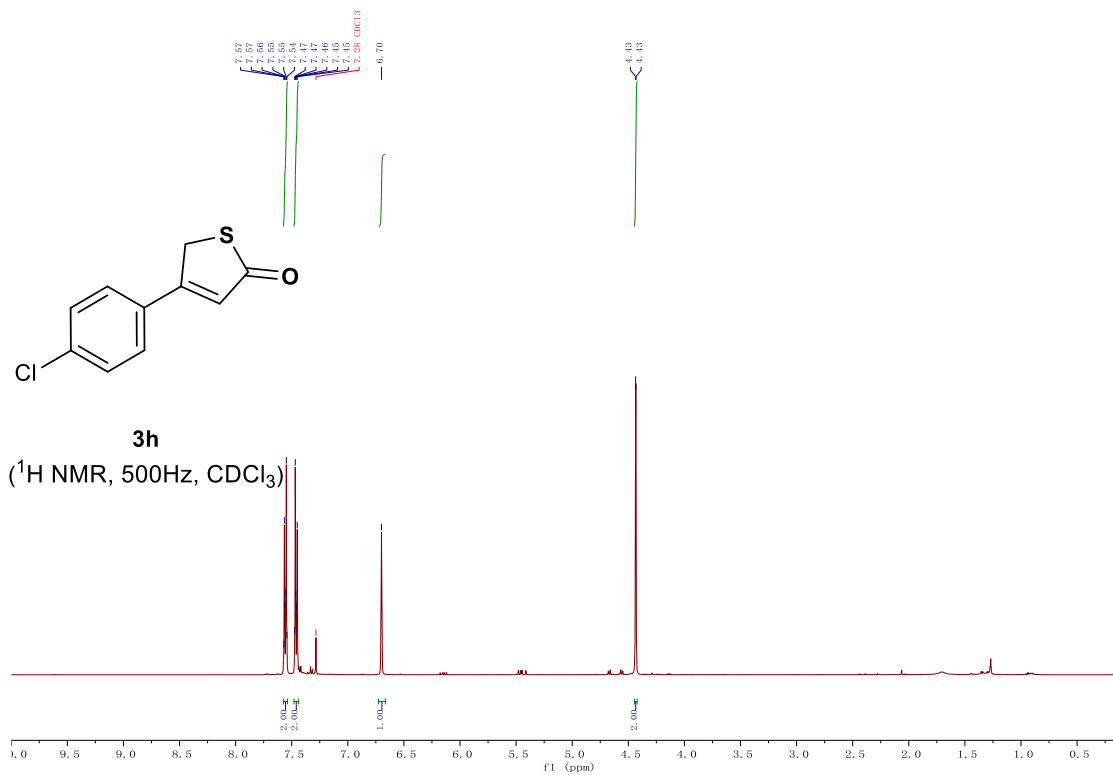



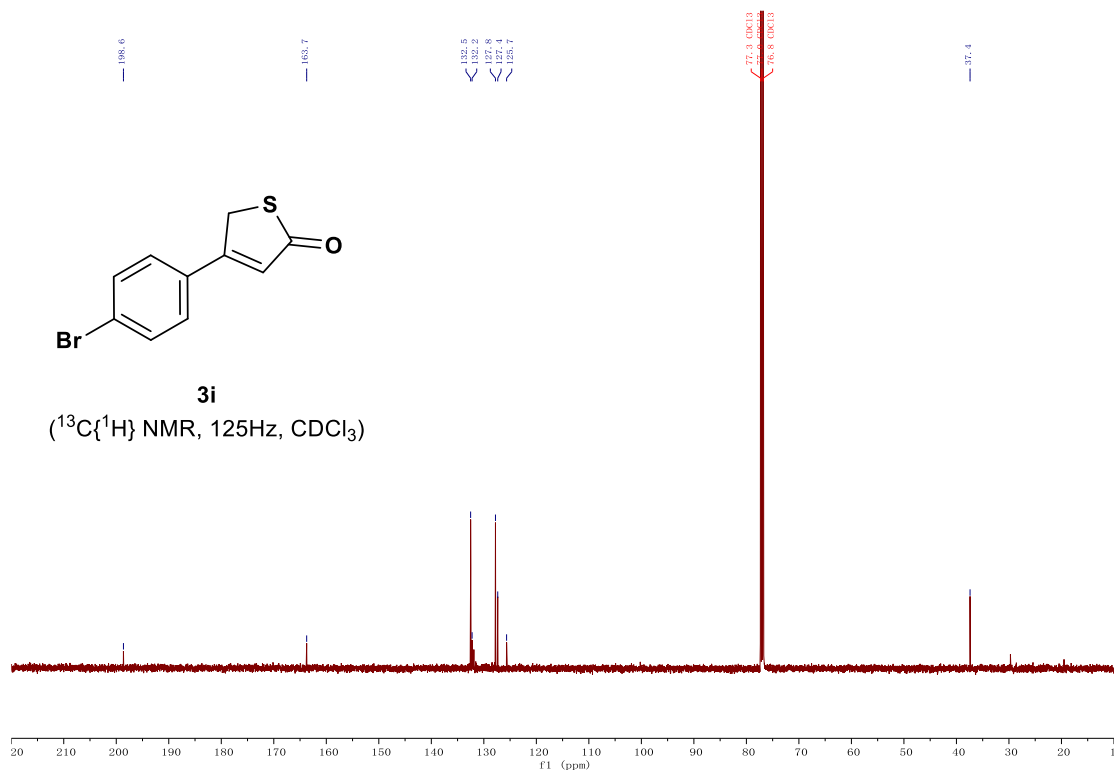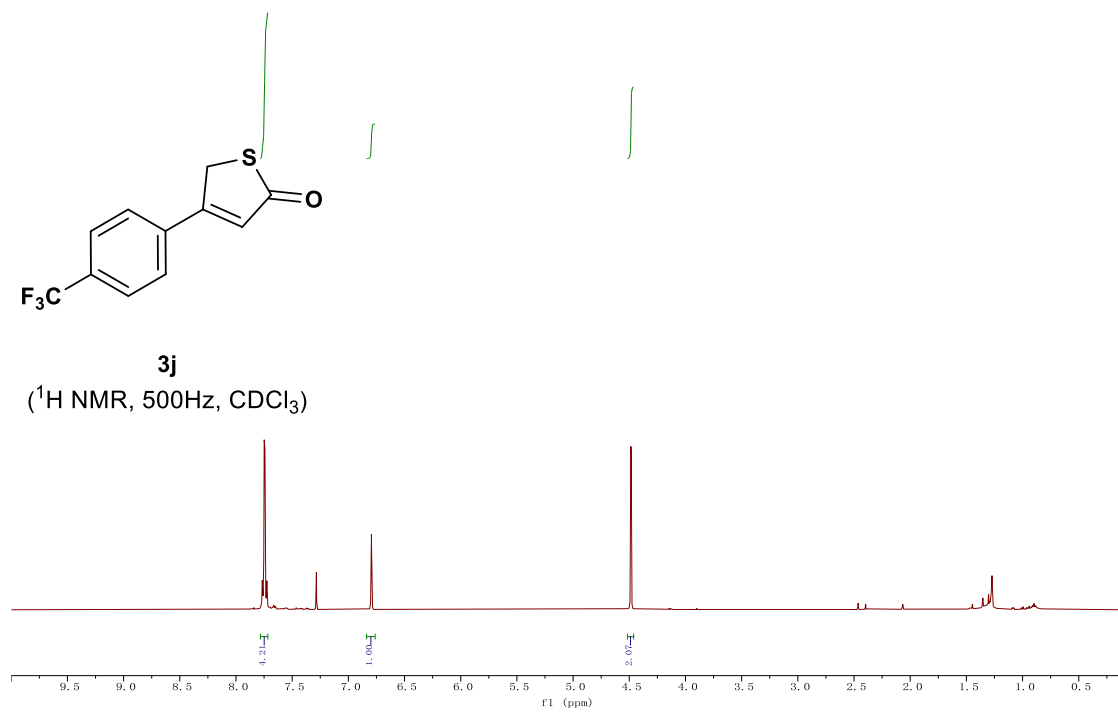

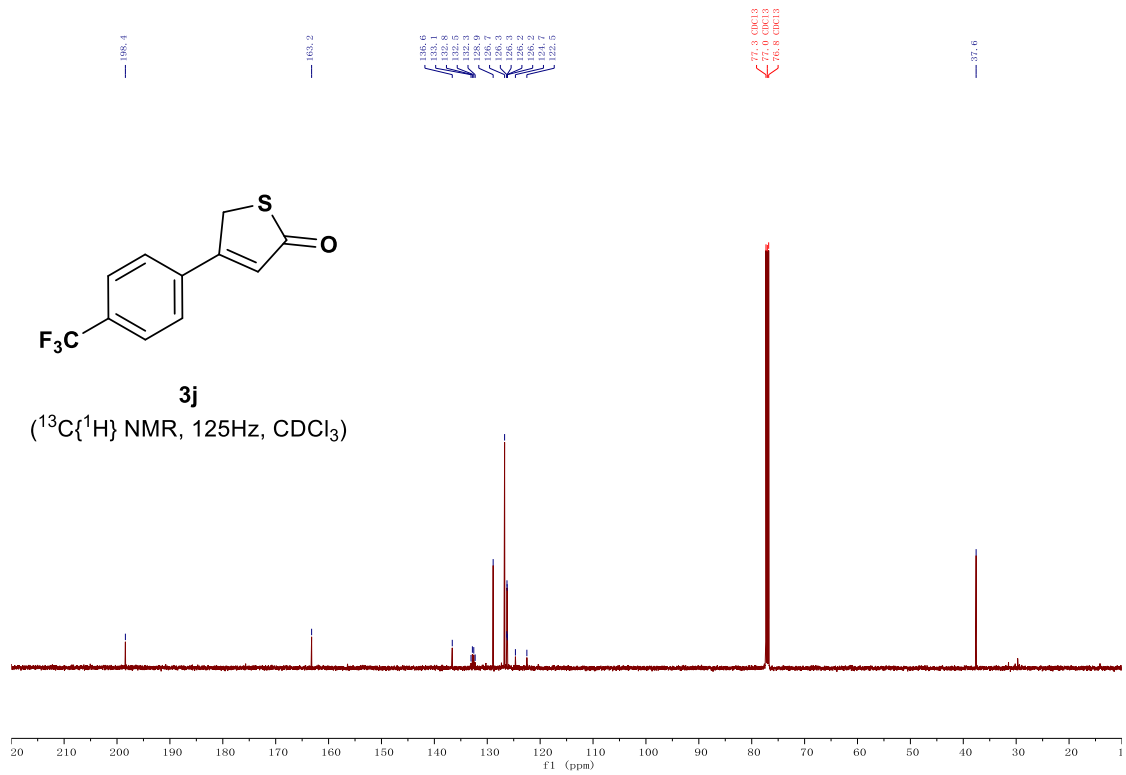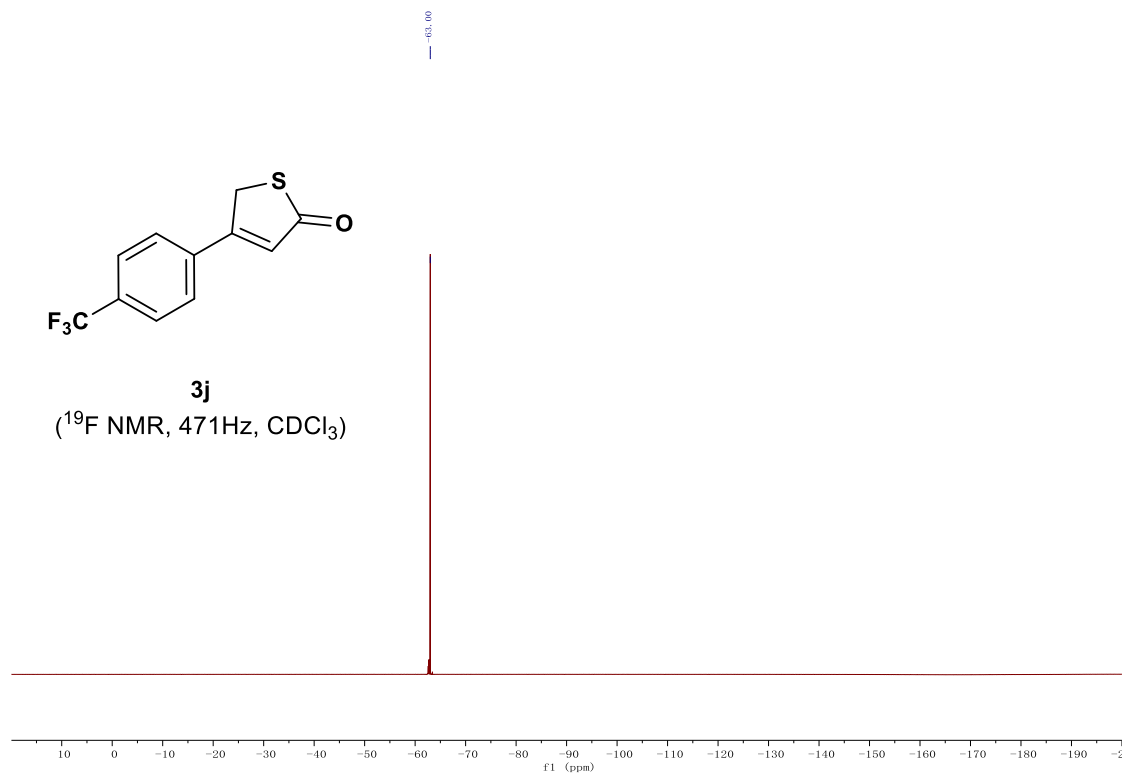

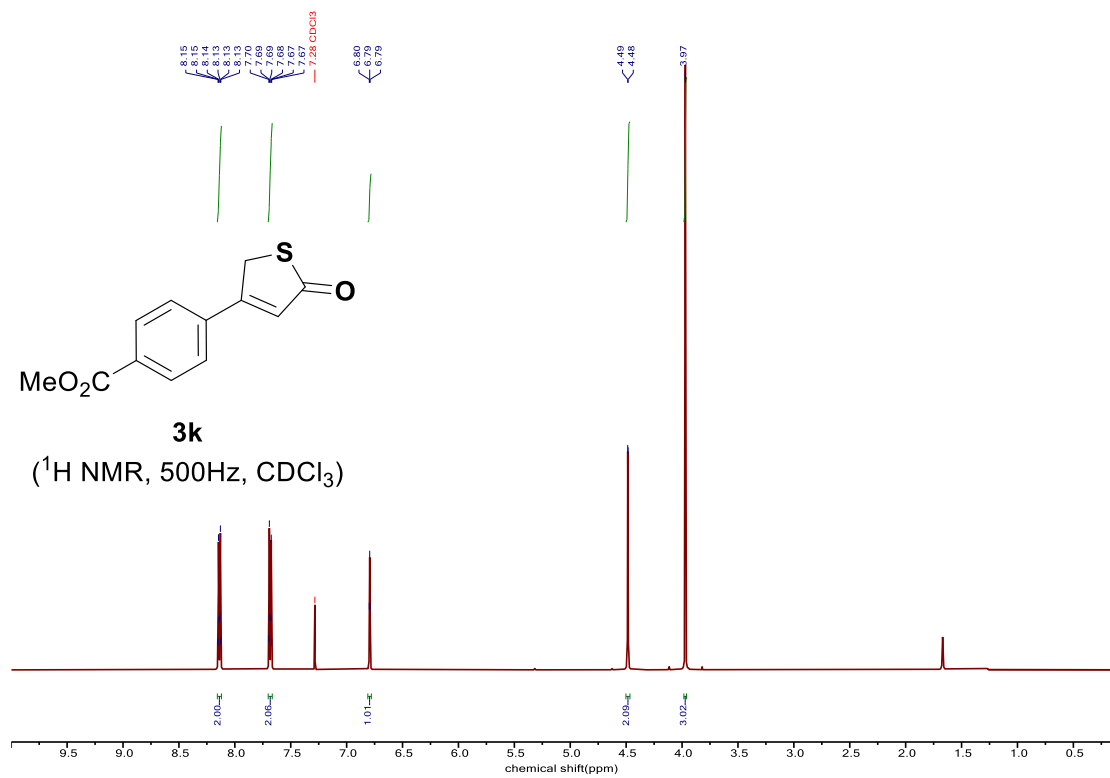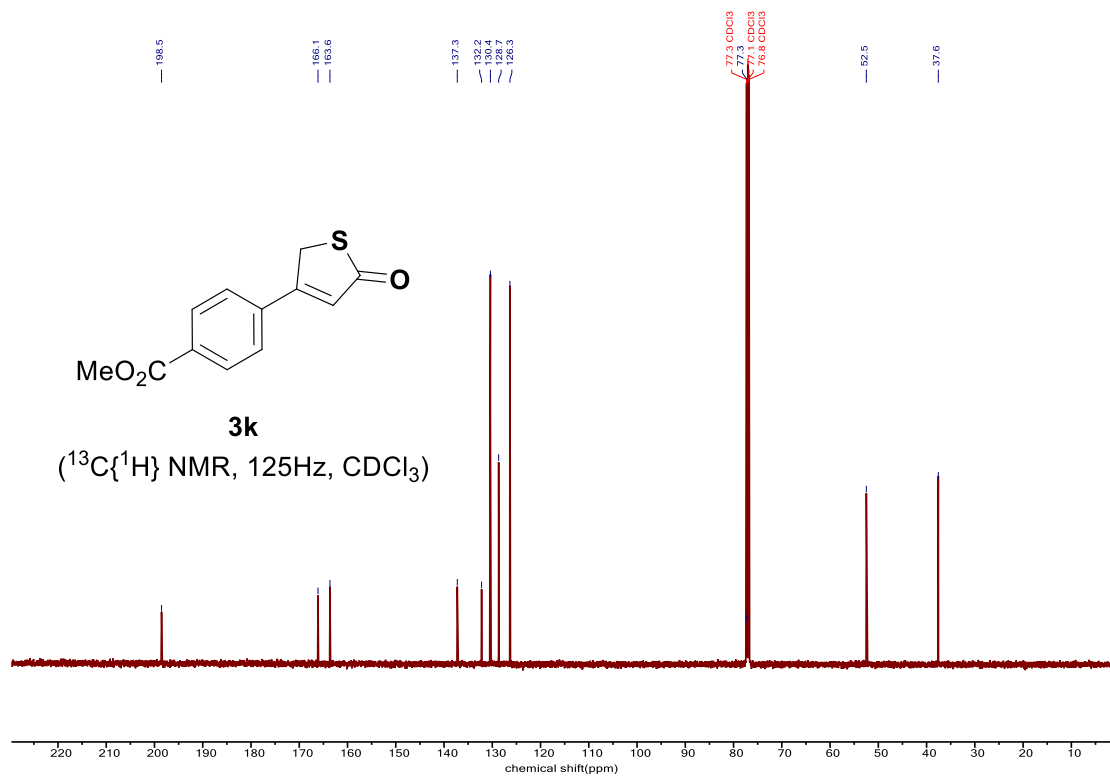

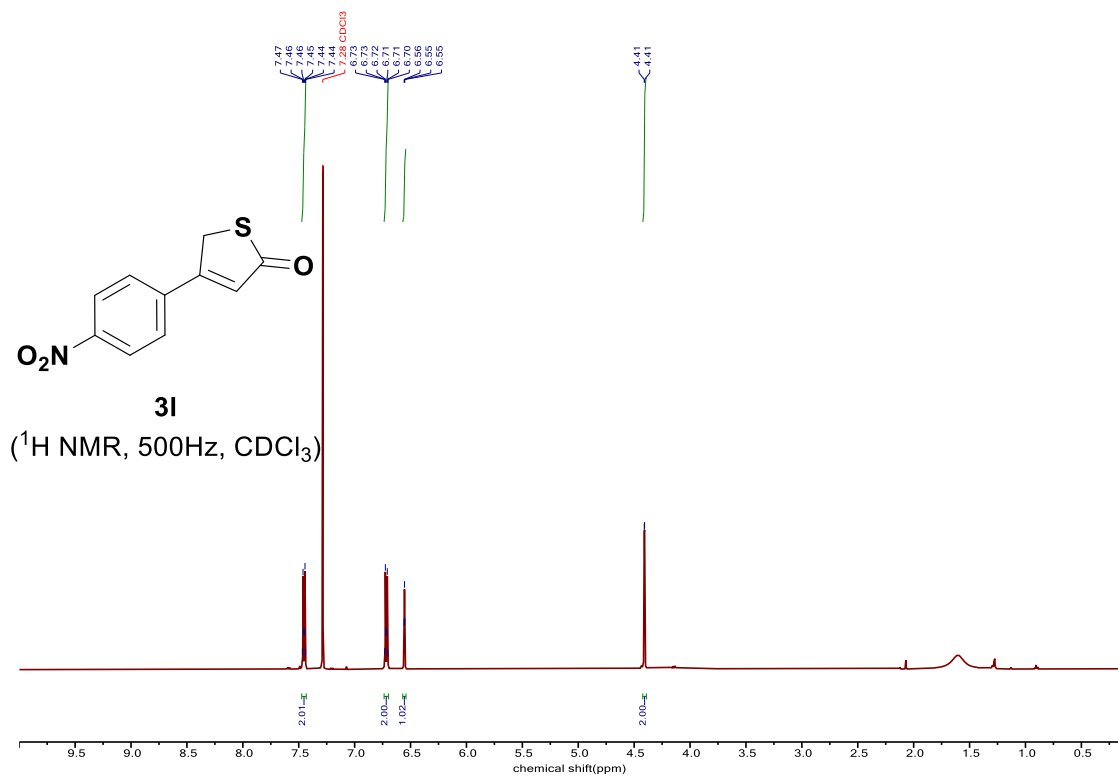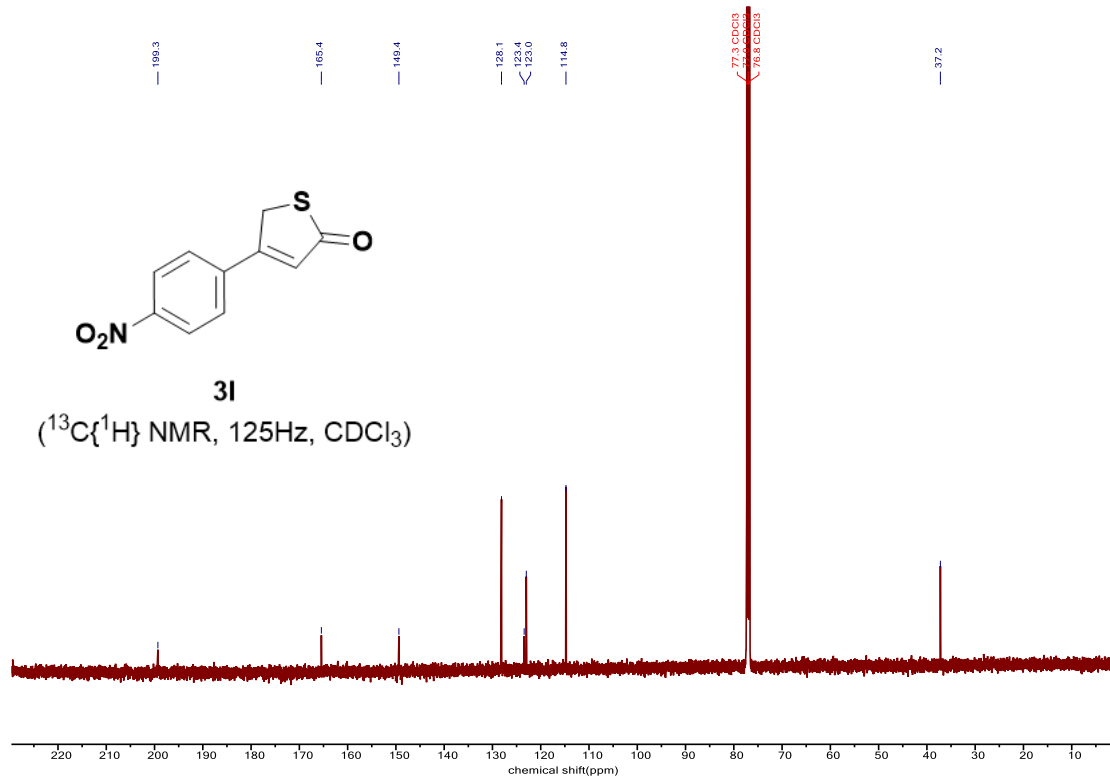



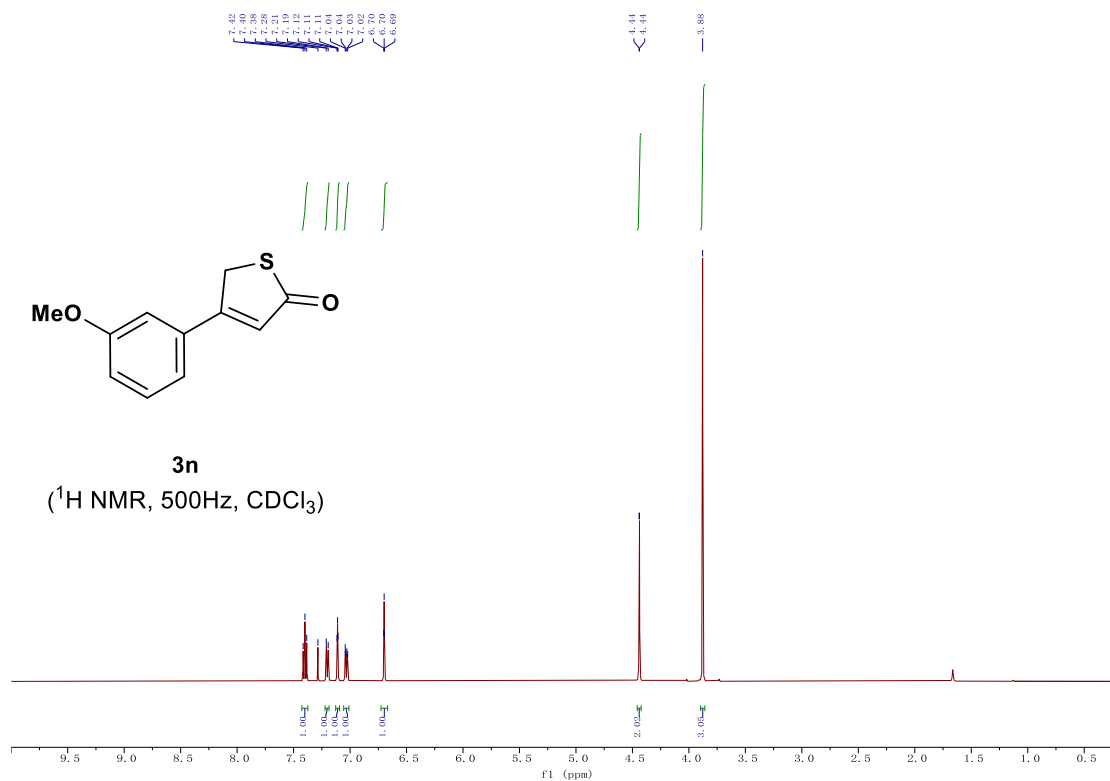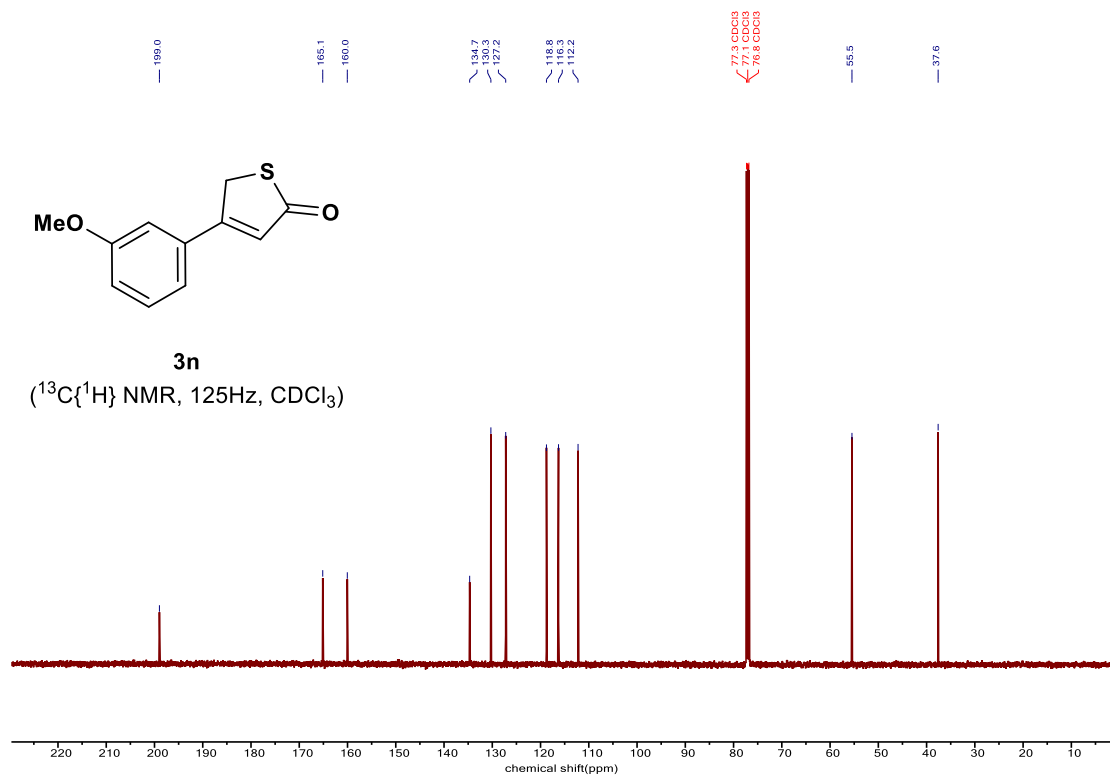

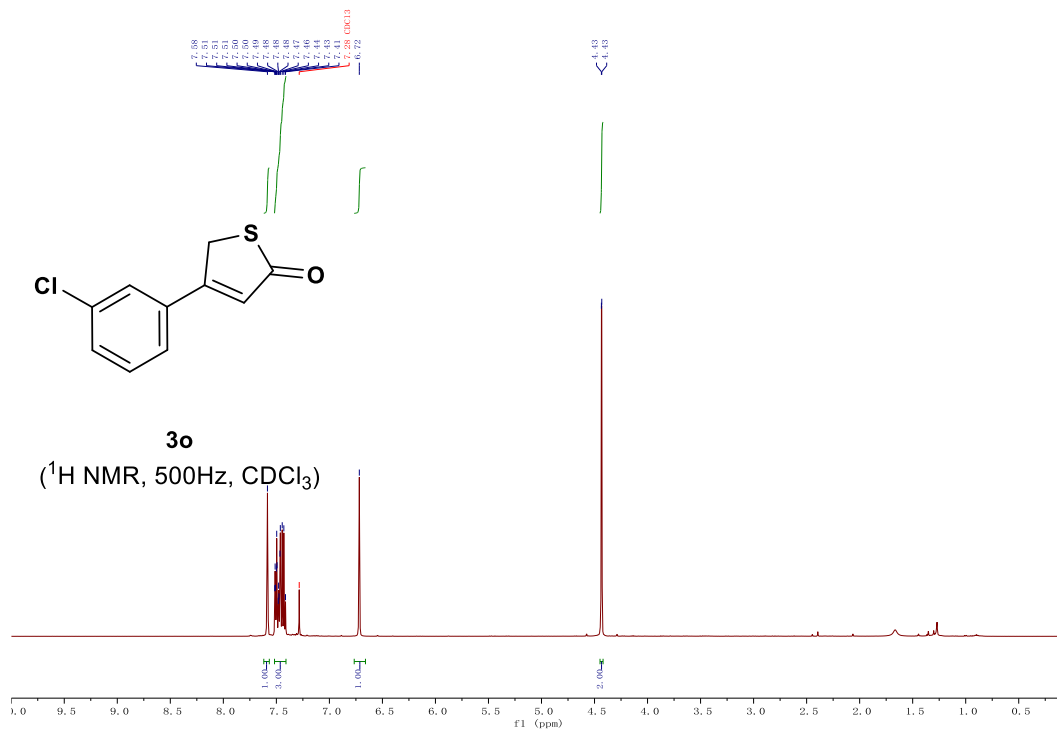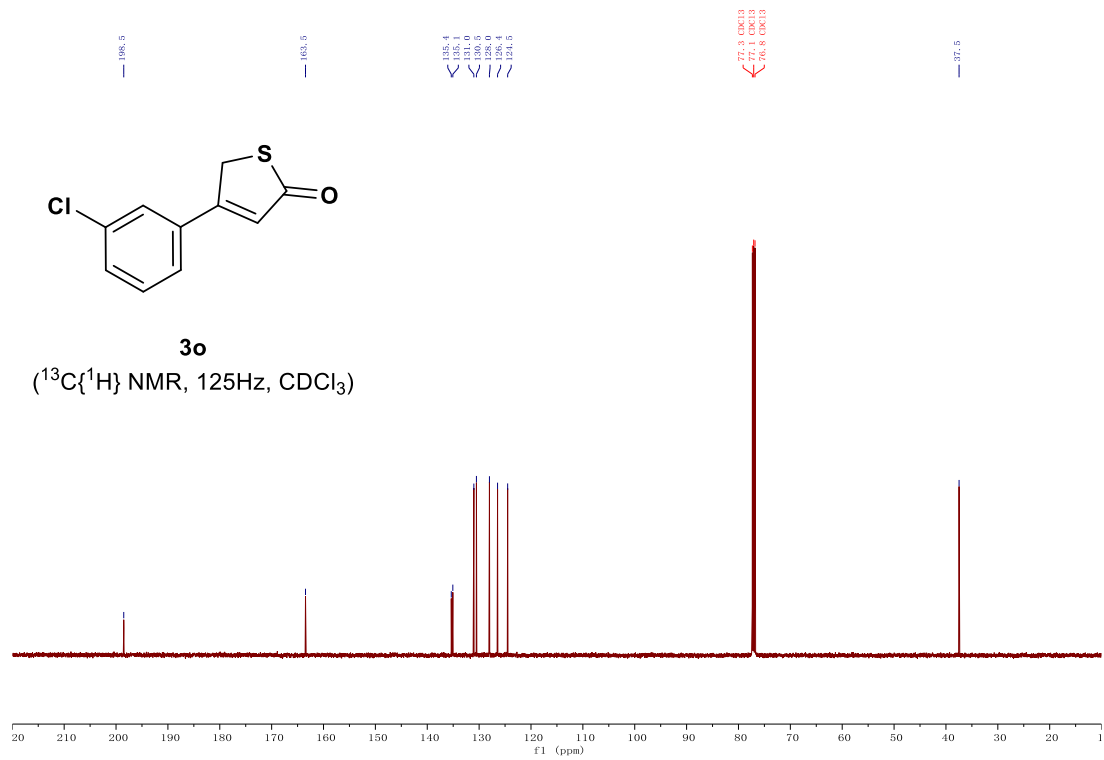



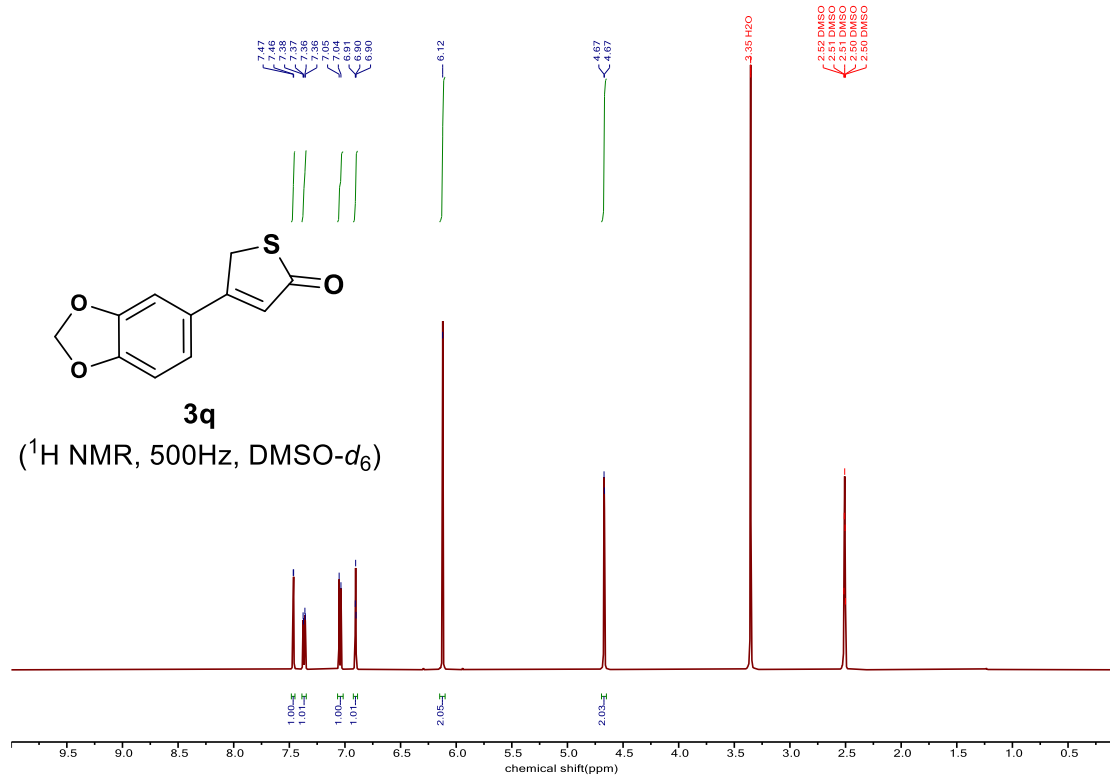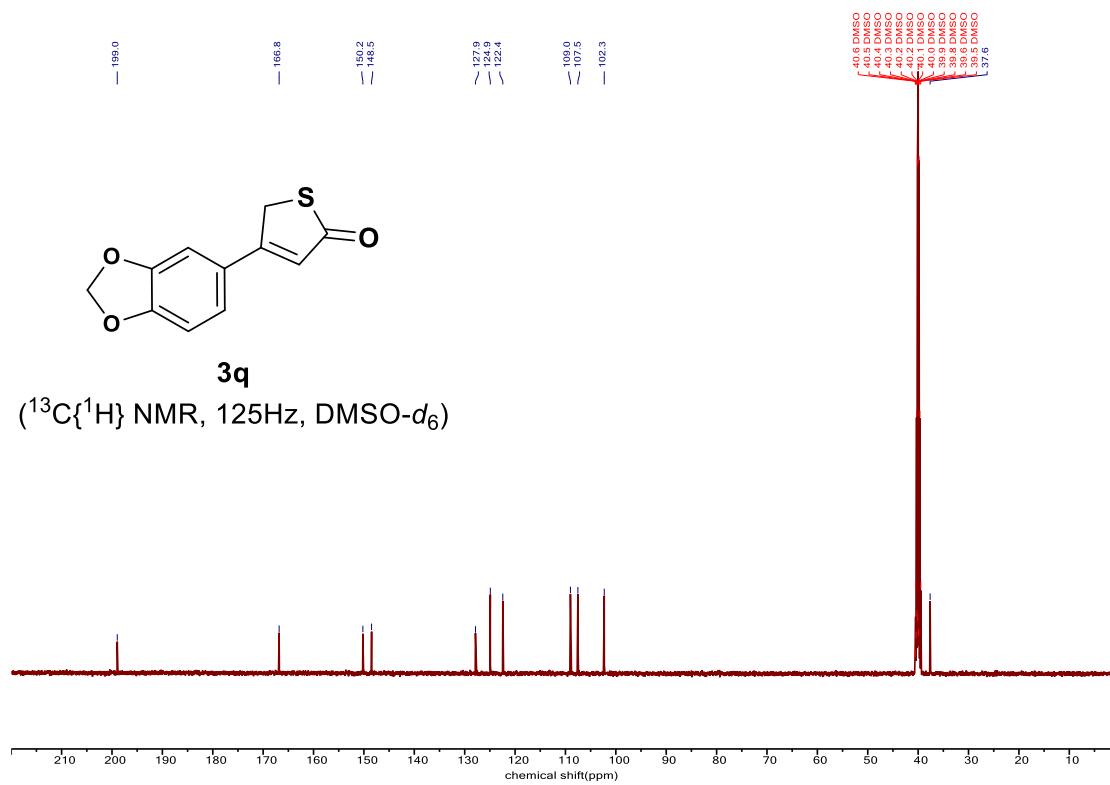

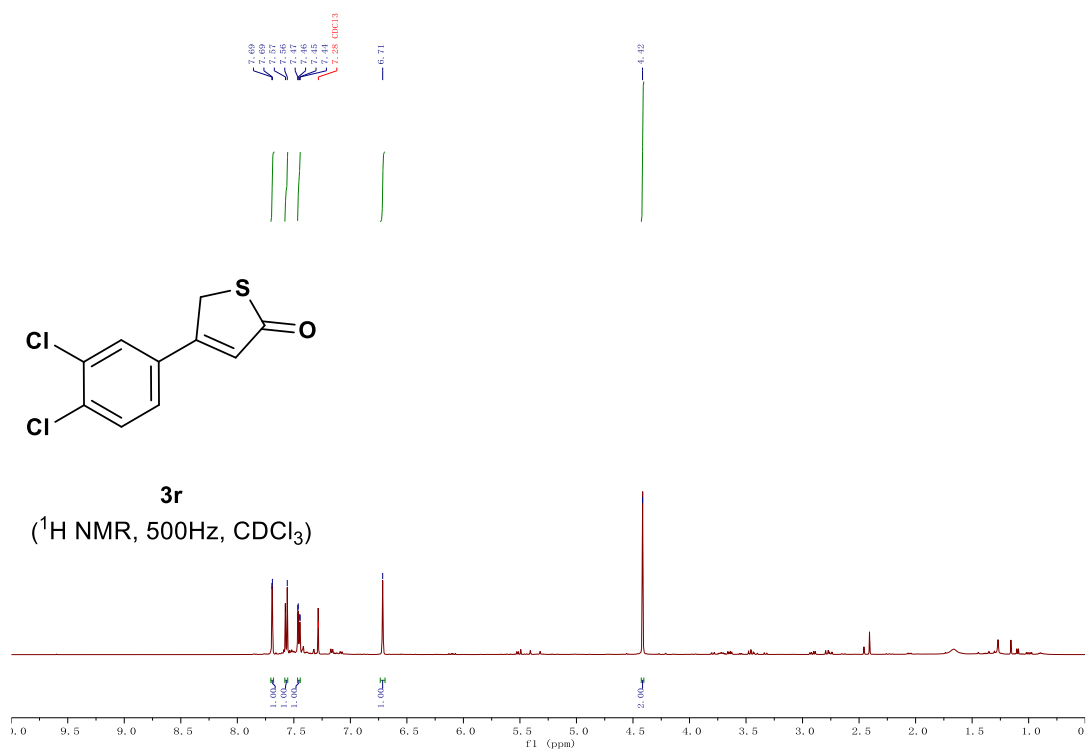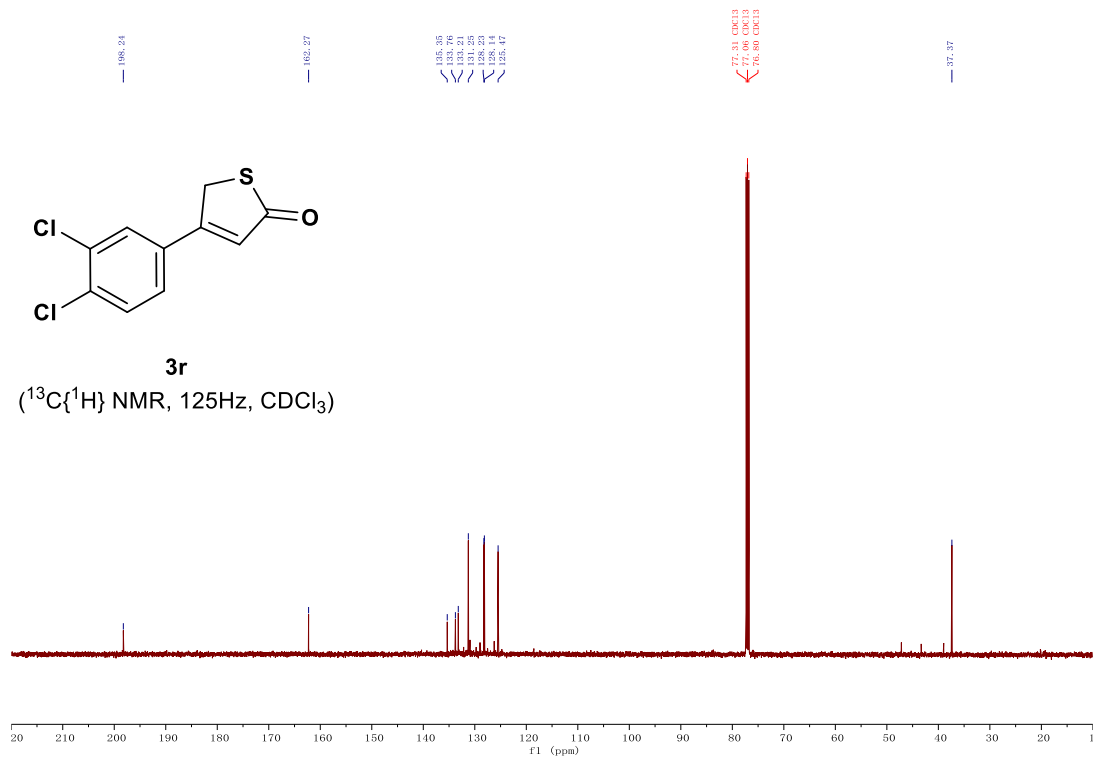









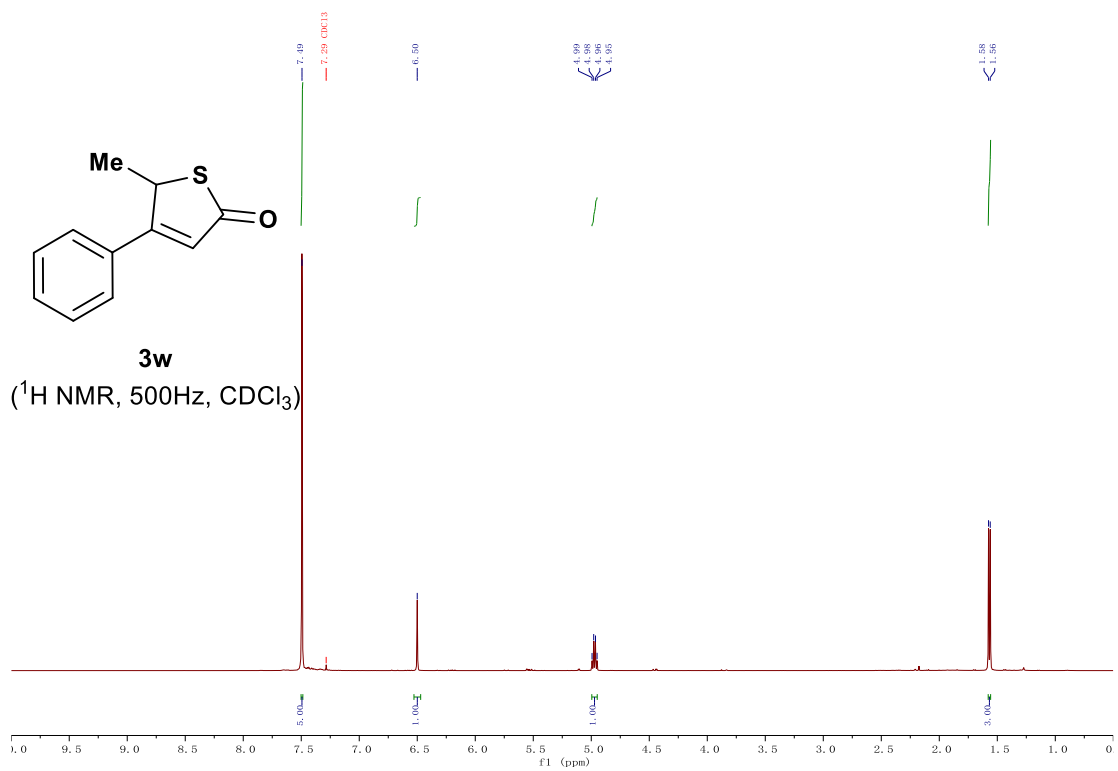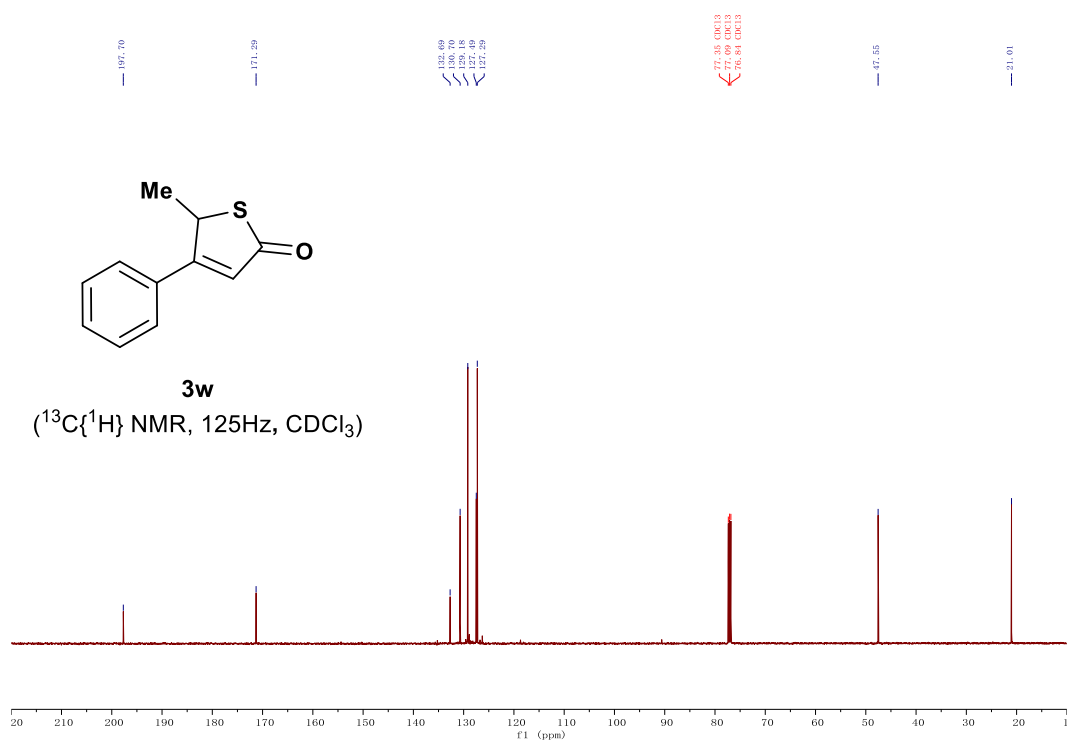



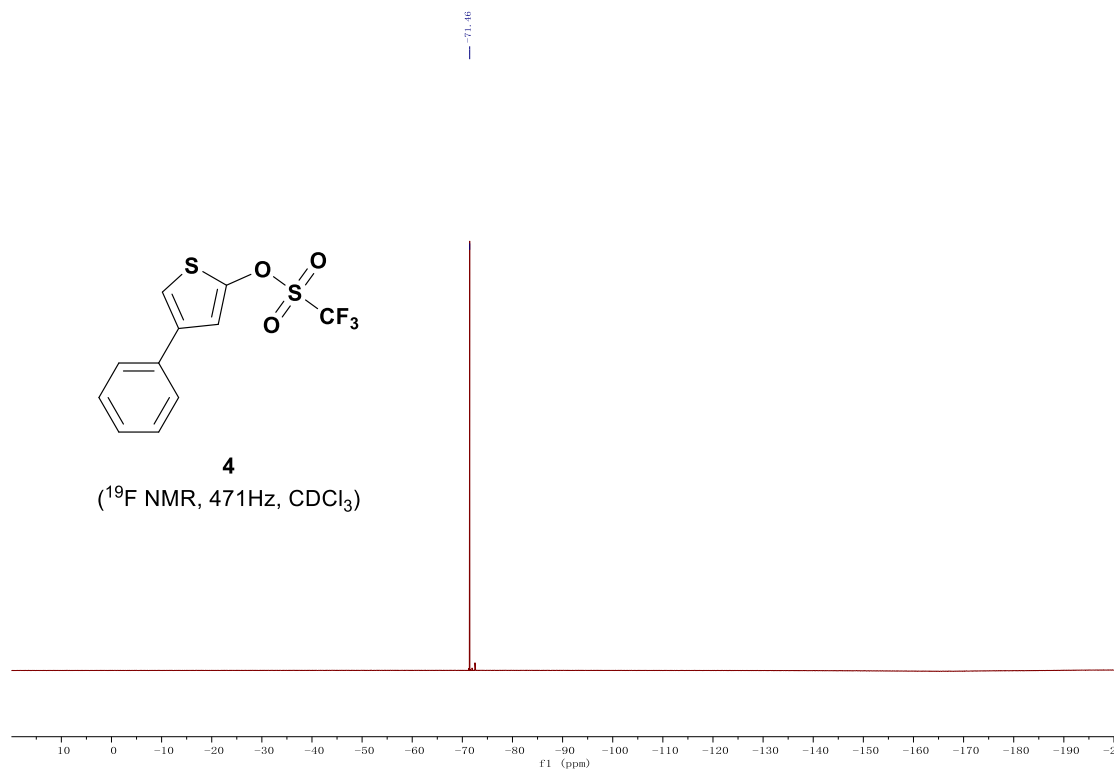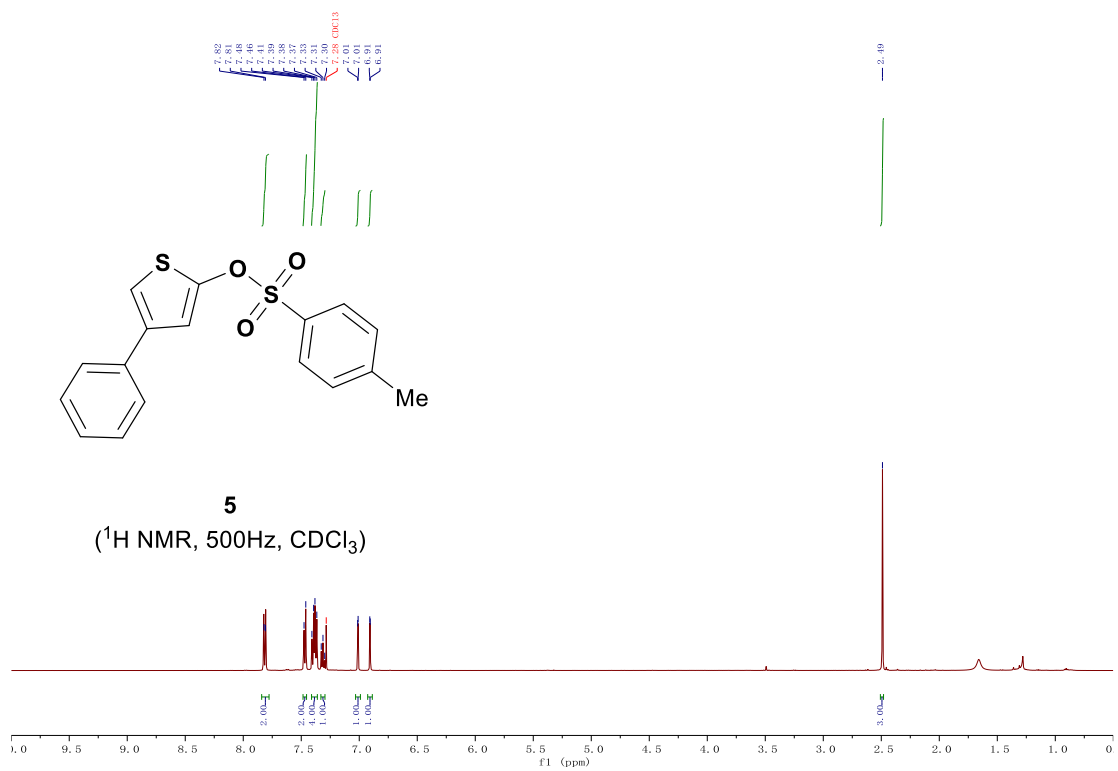

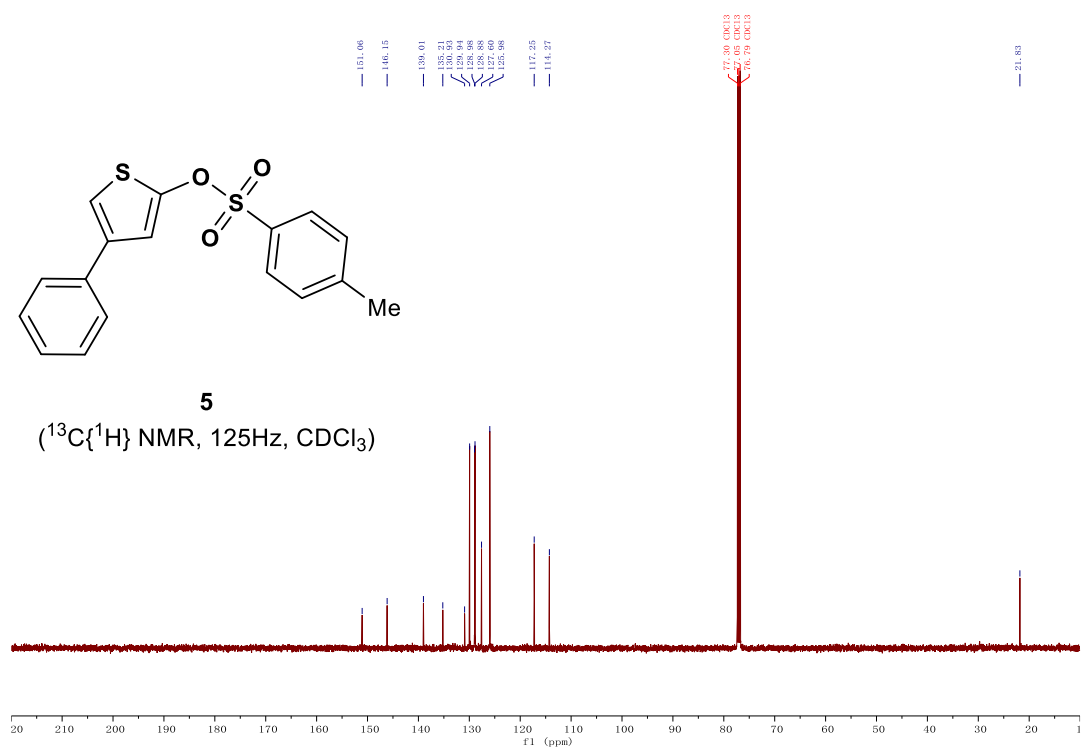

## 8. Single-crystal X-ray diffraction data

Preparation of the single crystals of compound **3a**: 5.0 mg of pure compounds **3a** was respectively dissolved in the combined solvents of *n*-hexane and CH<sub>2</sub>Cl<sub>2</sub> (16 mL, v/v = 15:1) at ambient temperature. The test tube was sealed by a piece of plastic film with several tiny holes, thus allowing the slow solvent evaporation. After about two weeks, several small crystals were observed at the bottom of the bottle. The crystals were collected and subjected to the single crystal X-ray diffraction analysis for the determination of the structure of **3a**. Single crystal X-ray crystallography data were collected by an Agilent Gemini E.

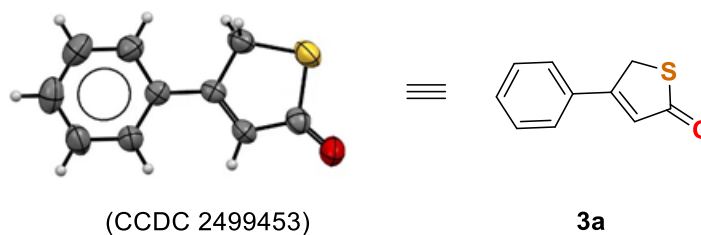

**Fig. S3** ORTEP plots for molecular structure of **3a** with the probability at 50% level.

**Table S9** Crystal data and structure refinement for exp\_9937 (**3a**)

| Entry                                    |                                                        |                                                                                  |
|------------------------------------------|--------------------------------------------------------|----------------------------------------------------------------------------------|
| Bond precision                           | C–C = 0.0039 Å                                         | Wavelength = 0.71073 Å                                                           |
| Cell                                     | a = 8.1246(11) Å<br>b = 6.4322(6) Å<br>c = 16.443(2) Å | $\alpha$ (alpha) = 90°<br>$\beta$ (beta) = 95.607(12)°<br>$\gamma$ (gamma) = 90° |
| Temperature                              | 296 K                                                  |                                                                                  |
| Volume                                   | Calculated<br>855.18(18) Å <sup>3</sup>                | Reported<br>855.18(18) Å <sup>3</sup>                                            |
| Space group                              | <i>P</i> 21/ <i>n</i>                                  | <i>P</i> 21/ <i>n</i>                                                            |
| Hall group                               | -P 2yn                                                 | -P 2yn                                                                           |
| Moiety formula                           | C <sub>10</sub> H <sub>8</sub> OS                      | C <sub>10</sub> H <sub>8</sub> OS                                                |
| Sum formula                              | C <sub>10</sub> H <sub>8</sub> OS                      | C <sub>10</sub> H <sub>8</sub> OS                                                |
| Mr                                       | 176.22                                                 | 176.22                                                                           |
| Dx (g/cm <sup>-3</sup> )                 | 1.369                                                  | 1.369                                                                            |
| Z                                        | 4                                                      | 4                                                                                |
| Mu (mm <sup>-1</sup> )                   | 0.320                                                  | 0.320                                                                            |
| F000                                     | 368.0                                                  | 368.0                                                                            |
| F000'                                    | 368.64                                                 |                                                                                  |
| h,k,l max                                | 11,8,22                                                | 11,8,20                                                                          |
| Nref                                     | 2295                                                   | 1955                                                                             |
| Tmin, Tmax                               | 0.926,0.944                                            | 0.834,1.000                                                                      |
| Tmin'                                    | 0.894                                                  |                                                                                  |
| Correction method = # Reported T Limits: | Tmin = 0.834 Tmax = 1.000                              |                                                                                  |
| AbsCorr = MULTI-SCAN                     |                                                        |                                                                                  |
| Data completeness = 0.852                | Theta(max) = 29.097                                    |                                                                                  |
| R(reflections) = 0.0631(1220)            | wR2(reflections) = 0.1267(1955)                        |                                                                                  |
| S = 1.065                                | Npar = 109                                             |                                                                                  |

## 9. Unsuccessful substrates

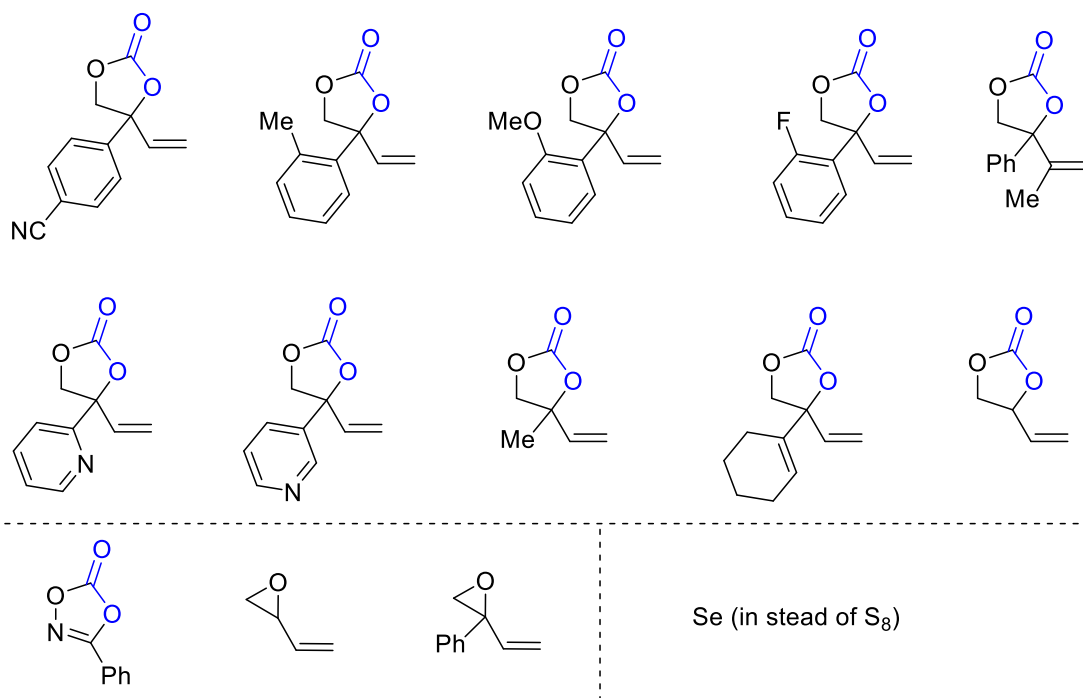

## 10. Reference

- 1 L. Chen, H. Quan, Z. Xu, H. Wang, Y. Xia, L. Lo and W. Yang, *Nat. Commun.*, 2020, **11**, 2521.
- 2 J. E. Gómez, W. Guo and A. W. Kleij, *Org. Lett.*, 2016, **18**, 6042–6045.
- 3 A. Khan, S. Khan, I. Khan, C. Zhao, Y. Mao, Y. Chen and Y. J. Zhang, *J. Am. Chem. Soc.*, 2017, **139**, 10733–10741.
- 4 M. Ke, Z. Liu, G. Huang, J. Wang, Y. Tao and F. Chen, *Org. Lett.*, 2020, **22**, 4135–4140.
- 5 A. R. Katritzky, D. Feng, H. Lang, M. Qi and P. J. Steel, *Can. J. Chem.*, 1998, **76**, 635–642.
